# Supplementary material for: Prognostic Factors for Patients with Anal Cancer Treated with Conformal Radiotherapy - A Systematic Review
Source: Research Square preprint supplement (doi:10.21203/rs.3.rs-1324086/v1), 2022-02-14
Supplement: Supplementary file [file 47351652c934861d05fda93c.pdf]

**Appendix A.** Full search strategies employed in Embase and Medline to identify relevant papers between January 1st 2000 and June 30th 2020.

**Table A1.** Complete search strategy used in Embase.

| Database: Embase Classic+Embase <1947 to 2020 June 30> |                                                                                                                                                                                                                          |
|--------------------------------------------------------|--------------------------------------------------------------------------------------------------------------------------------------------------------------------------------------------------------------------------|
| 1                                                      | exp radiotherapy/ (599698)                                                                                                                                                                                               |
| 2                                                      | Radiation Oncology/ (3434)                                                                                                                                                                                               |
| 3                                                      | (radiotherap* or radiotreat* or roentgentherap* or radiosurg*).tw. (285655)                                                                                                                                              |
| 4                                                      | ((radiat* or radio* or irradiat* or roentgen or x-ray or xray) adj4 (therap* or treat* or repair* or oncolog* or surg*)).tw. (396128)                                                                                    |
| 5                                                      | (RT or RTx or XRT).tw. (308595)                                                                                                                                                                                          |
| 6                                                      | exp chemoradiotherapy/ (52074)                                                                                                                                                                                           |
| 7                                                      | (chemoradiotherap* or radiochemotherap* or chemoradiation*).tw. (53407)                                                                                                                                                  |
| 8                                                      | (CRT or CRTx or CCRT or NCRT or RCTx or RT-CT or chemoRT).tw. (38794)                                                                                                                                                    |
| 9                                                      | or/1-8 [radiotherapy or chemeradiotherapy] (1107122)                                                                                                                                                                     |
| 10                                                     | exp Anus cancer/ (8197)                                                                                                                                                                                                  |
| 11                                                     | ((anus or anal) adj5 (cancer* or neoplas* or carcinoma* or tumo?*)).tw,kw. (10640)                                                                                                                                       |
| 12                                                     | or/10-11 [anal cancer] (13164)                                                                                                                                                                                           |
| 13                                                     | (predict* and (outcome* or risk* or model*)).tw. (1210603)                                                                                                                                                               |
| 14                                                     | (validate or rule*).tw. (376396)                                                                                                                                                                                         |
| 15                                                     | predict*.ti. (470931)                                                                                                                                                                                                    |
| 16                                                     | ((history or variable* or criteria or scor* or characteristic* or finding* or factor*) and (predict* or model* or decision* or identify or prognose)).tw. (3153437)                                                      |
| 17                                                     | (prognostic and (history or variable* or criteria or scor* or characteristic* or finding* or factor* or model*)).tw. (343683)                                                                                            |
| 18                                                     | ROC Curve/ (57455)                                                                                                                                                                                                       |
| 19                                                     | (stratification or discrimination or discriminate or c-statistic or c statistic or area under the curve or AUC or calibration or indices or algorithm or multivariable or (model and outcome) or classif*).tw. (2013800) |
| 20                                                     | ((model* or clinical).tw. or logistics models/) and decision.tw. (183621)                                                                                                                                                |
| 21                                                     | or/13-20 [predictive factor or outcomes] (5491959)                                                                                                                                                                       |
| 22                                                     | 9 and 12 and 21 [radiotherapy or chemoradiotherapy and anal cancer and predictive factors for outcomes] (1219)                                                                                                           |
| 23                                                     | limit 22 to yr="2000 -Current" (1134)                                                                                                                                                                                    |
| 24                                                     | remove duplicates from 23 (1109)                                                                                                                                                                                         |

**Table A2.** Complete search strategy used in Medline.

| Database: Ovid MEDLINE(R) and Epub Ahead of Print, In-Process & Other Non-Indexed Citations and Daily <1946 to June 30, 2020> |                                                                                                                                       |
|-------------------------------------------------------------------------------------------------------------------------------|---------------------------------------------------------------------------------------------------------------------------------------|
| 1                                                                                                                             | exp Radiotherapy/ (184934)                                                                                                            |
| 2                                                                                                                             | Radiation Oncology/ (4114)                                                                                                            |
| 3                                                                                                                             | (radiotherap* or radiotreat* or roentgentherap* or radiosurg*).tw. (179332)                                                           |
| 4                                                                                                                             | ((radiat* or radio* or irradiat* or roentgen or x-ray or xray) adj4 (therap* or treat* or repair* or oncolog* or surg*)).tw. (244503) |
| 5                                                                                                                             | (RT or RTx or XRT).tw. (201228)                                                                                                       |
| 6                                                                                                                             | exp Chemoradiotherapy/ (14534)                                                                                                        |

|    |                                                                                                                                                                                                                          |
|----|--------------------------------------------------------------------------------------------------------------------------------------------------------------------------------------------------------------------------|
| 7  | (chemoradiotherap* or radiochemotherap* or chemoradiation*).tw. (30229)                                                                                                                                                  |
| 8  | (CRT or CRTx or CCRT or NCRT or RCTx or RT-CT or chemoRT).tw. (18166)                                                                                                                                                    |
| 9  | or/1-8 [radiotherapy or chemeradiotherapy] (615114)                                                                                                                                                                      |
| 10 | exp Anus Neoplasms/ (6335)                                                                                                                                                                                               |
| 11 | ((anus or anal) adj5 (cancer* or neoplas* or carcinoma* or tumo?r*)).tw,kw. (6355)                                                                                                                                       |
| 12 | or/10-11 [anal cancer] (9210)                                                                                                                                                                                            |
| 13 | (predict* and (outcome* or risk* or model*)).tw. (847317)                                                                                                                                                                |
| 14 | (validate or rule*).tw. (265142)                                                                                                                                                                                         |
| 15 | predict*.ti. (325883)                                                                                                                                                                                                    |
| 16 | ((history or variable* or criteria or scor* or characteristic* or finding* or factor*) and (predict* or model* or decision* or identify or prognose)).tw. (2253192)                                                      |
| 17 | (prognostic and (history or variable* or criteria or scor* or characteristic* or finding* or factor* or model*)).tw. (216359)                                                                                            |
| 18 | ROC Curve/ (57771)                                                                                                                                                                                                       |
| 19 | (stratification or discrimination or discriminate or c-statistic or c statistic or area under the curve or AUC or calibration or indices or algorithm or multivariable or (model and outcome) or classif*).tw. (1421211) |
| 20 | ((model* or clinical).tw. or logistics models/) and decision.tw. (123422)                                                                                                                                                |
| 21 | or/13-20 [predictive factor or outcomes] (3986478)                                                                                                                                                                       |
| 22 | 9 and 12 and 21 [radiotherapy or chemoradiotherapy and anal cancer and predictive factors for outcomes] (522)                                                                                                            |
| 23 | limit 22 to yr="2000-2020" (458)                                                                                                                                                                                         |

**Appendix B.** Complete results from the study quality appraisal by both reviewers (ST and RS), including the assessment criteria used. Y: Yes. N: No. NR: Not reported.

**Case series study appraisal criteria:**

1. Was the study question or objective clearly stated?
2. Was the study population clearly and fully described, including a case definition?
3. Were the cases consecutive?
4. Were the subjects comparable? Reasonably homogeneous study population
5. Was the intervention clearly described?
6. Were the outcome measures clearly defined, valid, reliable, and implemented consistently across all study participants?
7. Was the length of follow-up adequate? 3 years according to PLATO
8. Were the statistical methods well-described?
9. Were the results well-described?

**Table B1.** Study quality appraisal by ST.

| Study/Criterion            | 1 | 2 | 3  | 4 | 5 | 6 | 7  | 8 | 9 | Quality rating<br>(Good/Fair/Poor) | Type of study |
|----------------------------|---|---|----|---|---|---|----|---|---|------------------------------------|---------------|
| Shakir et al. (2020)       | Y | Y | Y  | Y | Y | Y | N  | Y | Y | Good                               | Case series   |
| Martin et al. (2020)       | Y | Y | NR | Y | Y | Y | Y  | Y | Y | Good                               | Case series   |
| de Bellefon et al. (2020)  | N | Y | Y  | Y | Y | Y | Y  | Y | Y | Good                               | Case series   |
| Brown et al. (2019)        | Y | Y | Y  | Y | N | Y | N  | Y | Y | Good                               | Case series   |
| Rouard et al. (2019)       | Y | Y | Y  | Y | Y | Y | N  | Y | Y | Good                               | Case series   |
| Franco et al. (2018)       | Y | Y | NR | Y | Y | Y | N  | Y | Y | Good                               | Case series   |
| Call et al. (2016)         | N | Y | NR | Y | Y | Y | N  | Y | Y | Fair                               | Case series   |
| Balermipas et al. (2017)   | N | Y | NR | Y | Y | Y | Y  | Y | Y | Good                               | Case series   |
| Rodel et al. (2018)        | N | Y | NR | Y | Y | Y | Y  | Y | Y | Good                               | Case series   |
| Schernberg et al. (2017)   | Y | Y | Y  | Y | Y | Y | Y  | Y | Y | Good                               | Case series   |
| Martin et al. (2019)       | Y | Y | NR | Y | Y | Y | NR | Y | Y | Good                               | Case series   |
| Oehler-Janne et al. (2008) | Y | Y | Y  | N | Y | Y | Y  | Y | Y | Good                               | Case series   |
| Susko et al. (2020)        | Y | Y | NR | Y | Y | Y | N  | Y | Y | Good                               | Case series   |
| Cardenas et al. (2017)     | Y | Y | NR | Y | Y | N | N  | Y | Y | Fair                               | Case series   |
| Bitterman et al. (2015)    | N | Y | Y  | Y | Y | Y | N  | Y | Y | Good                               | Case series   |
| Fraunholz et al. (2013)    | Y | Y | NR | Y | Y | Y | Y  | Y | Y | Good                               | Case series   |
| Schernberg et al. (2017)*  | Y | Y | Y  | Y | Y | N | Y  | Y | Y | Good                               | Case series   |
| Hosni et al. (2018)        | N | Y | NR | Y | Y | N | Y  | Y | Y | Fair                               | Case series   |
| Oblak et al. (2016)        | Y | Y | Y  | Y | Y | Y | Y  | Y | Y | Good                               | Case series   |

**Table B2.** Study quality appraisal by RS.

| Study/Criterion           | 1 | 2 | 3  | 4 | 5 | 6 | 7 | 8 | 9 | Quality rating<br>(Good/Fair/Poor) | Type of study |
|---------------------------|---|---|----|---|---|---|---|---|---|------------------------------------|---------------|
| Shakir et al. (2020)      | Y | Y | Y  | Y | Y | Y | N | Y | Y | Good                               | Case series   |
| Martin et al. (2020)      | Y | Y | NR | Y | Y | Y | Y | Y | Y | Good                               | Case series   |
| de Bellefon et al. (2020) | Y | Y | Y  | Y | Y | Y | Y | Y | Y | Good                               | Case series   |
| Brown et al. (2019)       | Y | Y | Y  | Y | Y | Y | N | Y | Y | Good                               | Case series   |
| Rouard et al. (2019)      | Y | Y | Y  | Y | Y | Y | N | Y | Y | Good                               | Case series   |
| Franco et al. (2018)      | Y | Y | NR | Y | Y | Y | N | Y | Y | Good                               | Case series   |

|                            |   |   |    |   |   |   |    |   |   |      |             |
|----------------------------|---|---|----|---|---|---|----|---|---|------|-------------|
| Call et al. (2016)         | Y | Y | NR | Y | Y | Y | N  | Y | Y | Good | Case series |
| Balermipas et al. (2017)   | N | Y | NR | Y | Y | Y | Y  | Y | Y | Good | Case series |
| Rodel et al. (2018)        | N | Y | NR | Y | Y | Y | Y  | Y | Y | Good | Case series |
| Schernberg et al. (2017)   | Y | Y | Y  | Y | Y | Y | Y  | Y | Y | Good | Case series |
| Martin et al. (2019)       | Y | Y | NR | Y | Y | Y | NR | Y | Y | Good | Case series |
| Oehler-Janne et al. (2008) | N | Y | Y  | N | Y | Y | Y  | Y | Y | Good | Case series |
| Susko et al. (2020)        | Y | Y | Y  | Y | Y | N | N  | Y | Y | Good | Case series |
| Cardenas et al. (2017)     | Y | Y | NR | Y | Y | N | N  | Y | Y | Fair | Case series |
| Bitterman et al. (2015)    | Y | Y | Y  | Y | Y | Y | N  | Y | Y | Good | Case series |
| Fraunholz et al. (2013)    | Y | Y | NR | Y | Y | Y | Y  | Y | Y | Good | Case series |
| Schernberg et al. (2017)*  | Y | Y | Y  | Y | Y | N | Y  | Y | Y | Good | Case series |
| Hosni et al. (2018)        | N | Y | NR | Y | Y | N | Y  | Y | Y | Fair | Case series |
| Oblak et al. (2016)        | Y | Y | Y  | Y | Y | Y | Y  | Y | Y | Good | Case series |

**Appendix C.** Complete overview of study characteristics, including the predictors tested in each study. NR: not reported. SCC: Squamous cell carcinoma. RT: radiotherapy. CRT: chemoradiotherapy. MMC: Mitomycin C.

| # | Study                                                                                                                                                                                                                         | Year of publication | Location              | Study design  | Number of patients | Years of treatment | RT technique                    | Cancer subtype and location in cohort | TNM staging version used | Median follow-up (months) | Type of statistical analysis used                        | Predictors tested                                                                                                             | Quality score |
|---|-------------------------------------------------------------------------------------------------------------------------------------------------------------------------------------------------------------------------------|---------------------|-----------------------|---------------|--------------------|--------------------|---------------------------------|---------------------------------------|--------------------------|---------------------------|----------------------------------------------------------|-------------------------------------------------------------------------------------------------------------------------------|---------------|
| 1 | Patterns and Predictors of Relapse Following Radical Chemoradiation Therapy Delivered Using Intensity Modulated Radiation Therapy with a Simultaneous Integrated Boost in Anal Squamous Cell Carcinoma [Shakir et al. (2020)] | 2020                | Multi-centre, Europe  | Retrospective | 385                | 2013-2018          | IMRT                            | SCC of the anal canal and anal margin | 7 & 8                    | 24.0                      | Univariable Cox regression, multivariable Cox regression | Age, sex, performance status, T stage, N stage (TNM 7 and 8), RT completion, chemotherapy type                                | Good          |
| 2 | Acute organ toxicity correlates with better clinical outcome after chemoradiotherapy in patients with anal carcinoma [Martin et al. (2020)]                                                                                   | 2020                | Single centre, Europe | Retrospective | 223                | 1996-2017          | 3D-CRT (58%) and IMRT (42%)     | SCC (location not specified)          | 7                        | 46.0                      | Univariable Cox regression, multivariable Cox regression | T stage, N stage, age, sex, high grade acute organ toxicity (HGAOT)                                                           | Good          |
| 3 | Long-term follow-up experience in anal canal cancer treated with Intensity-Modulated Radiation Therapy: Clinical outcomes, patterns of relapse and predictors of failure [de Bellefon et al. (2020)]                          | 2020                | Single centre, Europe | Retrospective | 193                | 2005-2017          | IMRT                            | SCC of the anal canal                 | 7 & 8                    | 70.0                      | Univariable Cox regression, multivariable Cox regression | Only significant factors reported - T stage, N stage, AJCC stage, sex, RT breaks, exclusive RT, lack of MMC, residual disease | Good          |
| 4 | Prediction of outcome in anal squamous cell carcinoma using radiomic feature analysis of pre-treatment FDG PET-CT [Brown et al. (2019)]                                                                                       | 2019                | Single centre, Europe | Retrospective | 189                | 2008-2016          | 2D/ 3D-CRT (79%) and VMAT (21%) | SCC (location not specified)          | NR                       | 35.1                      | Multivariable logistic regression                        | Only significant factors reported - Multiple FDG-PET scan variables, sex, age, T stage, N stage                               | Good          |

|   |                                                                                                                                                                          |      |                             |               |     |           |                 |                                       |    |      |                                                                             |                                                                                                                                                                                                                                                                                                            |      |
|---|--------------------------------------------------------------------------------------------------------------------------------------------------------------------------|------|-----------------------------|---------------|-----|-----------|-----------------|---------------------------------------|----|------|-----------------------------------------------------------------------------|------------------------------------------------------------------------------------------------------------------------------------------------------------------------------------------------------------------------------------------------------------------------------------------------------------|------|
| 5 | Intensity-modulated radiation therapy of anal squamous cell carcinoma: Relationship between delineation quality and regional recurrence [Rouard et al. (2019)]           | 2019 | Multi-centre, Europe        | Retrospective | 165 | 2006-2016 | IMRT            | SCC of the anal canal and anal margin | NR | 33.8 | Bivariable Cox regression, multivariable Cox regression                     | Sex, age, performance status, immunodepression, smoking status, tumour localisation, T stage, N stage, location of involved lymph nodes, tumour size, keratinisation, differentiation, HPV status, RT breaks, tumour boost technique, tumour total dose, chemotherapy type, multiple delineation variables | Good |
| 6 | The prognostic role of hemoglobin levels in patients undergoing concurrent chemo-radiation for anal cancer [Franco et al. (2018)]                                        | 2018 | Multi-centre, Europe        | Retrospective | 161 | NR        | IMRT            | SCC of the anal canal and anal margin | NR | 27.0 | Log-rank analysis, univariable Cox regression, multivariable Cox regression | Age, sex, T stage, N stage, response to treatment, overall treatment duration, RT total dose, boost, OTT, basal haemoglobin levels                                                                                                                                                                         | Good |
| 7 | Intensity-modulated Radiation Therapy for Anal Cancer Results From a Multi-Institutional Retrospective Cohort Study [Call et al. (2016)]                                 | 2016 | Multi-centre, North America | Retrospective | 152 | NR        | IMRT            | SCC (location not specified)          | NR | 26.8 | Log-rank analysis, multivariable Cox regression                             | Dose, N stage, T stage, RT duration                                                                                                                                                                                                                                                                        | Fair |
| 8 | Human papilloma virus load and PD-1/PD-L1, CD8+ and FOXP3 in anal cancer patients treated with chemoradiotherapy: Rationale for immunotherapy [Balermipas et al. (2017)] | 2017 | Multi-centre, Europe        | Retrospective | 150 | NR        | 3D-CRT and IMRT | SCC (location not specified)          | NR | 40.0 | Log-rank analysis, multivariable Cox regression                             | Age, gender, T stage, N stage, grade, HPV load, and CD8, PD1, PD-L1, FOXP3, pCASP8 expression                                                                                                                                                                                                              | Good |
| 9 | Prognostic impact of RITA expression in patients with anal squamous cell carcinoma treated with chemoradiotherapy [Rodel et al. (2018)]                                  | 2018 | Multi-centre, Europe        | Retrospective | 140 | NR        | 3D-CRT and IMRT | SCC (location not specified)          | NR | 40.0 | Log-rank analysis, multivariable Cox regression                             | Gender, T stage, N stage, HPV-16 DNA load, RITA expression                                                                                                                                                                                                                                                 | Good |

|    |                                                                                                                                                                                                                    |      |                              |               |     |           |                             |                                                                            |    |      |                                                                             |                                                                                                                                                             |      |
|----|--------------------------------------------------------------------------------------------------------------------------------------------------------------------------------------------------------------------|------|------------------------------|---------------|-----|-----------|-----------------------------|----------------------------------------------------------------------------|----|------|-----------------------------------------------------------------------------|-------------------------------------------------------------------------------------------------------------------------------------------------------------|------|
| 10 | External validation of leukocytosis and neutrophilia as a prognostic marker in anal carcinoma treated with definitive chemoradiation [Schernberg et al. (2017)]                                                    | 2017 | Multi-centre, Europe         | Retrospective | 133 | 2000-2015 | IMRT (77%) and 3D-CRT (23%) | SCC (location not specified)                                               | 7  | 37.4 | Log-rank analysis, multivariable Cox regression                             | Age, sex, T stage, N stage, performance status, leukocytosis, neutrophilia, anaemia, lymphopenia, monocytosis, thrombocytosis                               | Good |
| 11 | C-Reactive Protein-to-Albumin Ratio as Prognostic Marker for Anal Squamous Cell Carcinoma Treated with Chemoradiotherapy [Martin et al. (2019)]                                                                    | 2019 | Single centre, Europe        | Retrospective | 126 | 2004-2016 | IMRT (65%) and 3D-CRT (35%) | SCC (location not specified)                                               | 7  | NA   | Log-rank analysis, univariable Cox regression, multivariable Cox regression | Age, sex, HIV status, T stage, N stage, grade, C reactive protein to Albumin ratio, RT modality, RT total dose                                              | Good |
| 12 | HIV-specific differences in outcome of squamous cell carcinoma of the anal canal: a multicentric cohort study of HIV-positive patients receiving highly active antiretroviral therapy [Oehler-Janne et al. (2008)] | 2008 | Multi-centre, International  | Retrospective | 121 | 1997-2006 | 3D-CRT                      | SCC of the anal canal                                                      | NR | 36.0 | Log-rank analysis, univariable Cox regression, multivariable Cox regression | Not explicitly reported - Age, sex, WHO performance status, histologic subtype, tumour size, N stage, M stage, CDC stage, CD4 count, viral load, HAART type | Good |
| 13 | Factors Impacting Differential Outcomes in the Definitive Radiation Treatment of Anal Cancer Between HIV-Positive and HIV-Negative Patients [Susko et al. (2020)]                                                  | 2020 | Single centre, North America | Retrospective | 111 | 2005-2018 | 3D-CRT and IMRT             | SCC (location not specified)                                               | NR | 28.0 | Log-rank analysis, univariable Cox regression, multivariable Cox regression | Age, sex, T stage, N stage, HIV status, time from diagnosis to treatment, treatment duration                                                                | Good |
| 14 | Quantitative FDG-PET/CT predicts local recurrence and survival for squamous cell carcinoma of the anus [Cardenas et al. (2017)]                                                                                    | 2017 | Single centre, North America | Retrospective | 110 | 2003-2013 | IMRT (75%) and 2D-CRT (25%) | SCC (location not specified)                                               | NR | 28.6 | Univariable Cox regression, multivariable Cox regression                    | Multiple FDG-PET scan variables, RT modality, chemotherapy, T stage, N stage, HIV status                                                                    | Fair |
| 15 | Comparison of anal cancer outcomes in public and private hospital patients treated at a single radiation oncology center [Bitterman et al. (2015)]                                                                 | 2015 | Single centre, North America | Retrospective | 109 | 2004-2013 | IMRT (60%) and 3D-CRT (40%) | SCC (location not specified), cloacogenic (n=2) and adeno (n=2) carcinomas | NR | 14.9 | Log-rank analysis, multivariable Cox regression                             | Referral from public hospital, HIV status, T stage, RT technique, RT duration, RT delay                                                                     | Good |

|    |                                                                                                                                                                           |      |                              |               |     |           |                             |                                                                      |   |      |                                                          |                                                                                                                                                                                   |      |
|----|---------------------------------------------------------------------------------------------------------------------------------------------------------------------------|------|------------------------------|---------------|-----|-----------|-----------------------------|----------------------------------------------------------------------|---|------|----------------------------------------------------------|-----------------------------------------------------------------------------------------------------------------------------------------------------------------------------------|------|
| 16 | Epidermal Growth Factor Receptor Expression As Prognostic Marker in Patients With Anal Carcinoma Treated With Concurrent Chemoradiation Therapy [Fraunholz et al. (2013)] | 2013 | Multi-centre, Europe         | Retrospective | 103 | 1989-2011 | 3D-CRT                      | SCC, basaloid, cloacogenic (location not specified)                  | 7 | 44.0 | Log-rank analysis, multivariable Cox regression          | Age, sex, HIV status, T stage, N stage, grade, EGFR expression                                                                                                                    | Good |
| 17 | Leukocytosis and neutrophilia predicts outcome in anal cancer [Schernberg et al. (2017)*]                                                                                 | 2017 | Single centre, Europe        | Retrospective | 103 | 2006-2016 | IMRT (53%) and 3D-CRT (47%) | SCC (location not specified)                                         | 6 | 38.7 | Log-rank analysis, multivariable Cox regression          | Leukocytosis, neutrophilia, anaemia, T stage, N stage, CRT duration                                                                                                               | Good |
| 18 | The ongoing challenge of large anal cancers: prospective long term outcomes of intensity-modulated radiation therapy with concurrent chemotherapy [Hosni et al. (2018)]   | 2018 | Single centre, North America | Retrospective | 101 | 2008-2013 | IMRT                        | SCC of the anal canal, SCC of the anal canal with perianal extension | 7 | 56.5 | Univariable Cox regression, multivariable Cox regression | T stage, N stage, sex, age, grade, maximum tumour size, RT interruption                                                                                                           | Fair |
| 19 | The impact of anaemia on treatment outcome in patients with squamous cell carcinoma of anal canal and anal margin [Oblak et al. (2016)]                                   | 2016 | Single centre, Europe        | Retrospective | 100 | 2003-2013 | 3D-CRT and IMRT             | SCC of the anal canal and anal margin                                | 7 | 52.0 | Log-rank analysis, multivariable Cox regression          | Pre-treatment Hb, on-treatment Hb, end-of-treatment Hb, performance status, T stage, N stage, stage, histology, tumour site, blood transfusion, overall radiation time, operation | Good |



**Appendix D.** Outcome definitions given in each study, stratified into nine categories. The final stratification yielded three disease activity outcome categories and six survival outcome categories.

| # | Outcomes<br>(number of<br>studies reporting<br>outcome) | Outcomes included       | Study                              | Definition                                                                                                                                                                                                                                                 |
|---|---------------------------------------------------------|-------------------------|------------------------------------|------------------------------------------------------------------------------------------------------------------------------------------------------------------------------------------------------------------------------------------------------------|
| 1 | Overall survival<br>(n=17)                              | Overall survival        | Martin et al. (2020)<br>[21]       | Survival times were calculated from start of CRT to the date of respective events or last follow-up. Assessed with death of any cause as the respective event.                                                                                             |
|   |                                                         | Overall survival        | de Bellefon et al. (2020)<br>[22]  | Calculated starting from the first day of radiotherapy and defined as follows: death from any cause.                                                                                                                                                       |
|   |                                                         | Overall survival        | Rouard et al. (2019)<br>[24]       | The time between the first day of RT and the death (all causes). Surviving patients were censored at the date of last follow-up or five years after D1.                                                                                                    |
|   |                                                         | Overall survival        | Franco et al. (2018)<br>[25]       | Calculated from the date of diagnosis to that of death from any cause or lost at observation.                                                                                                                                                              |
|   |                                                         | Overall survival        | Call et al. (2016)<br>[26]         | Not defined.                                                                                                                                                                                                                                               |
|   |                                                         | Overall survival        | Balermipas et al. (2017)<br>[27]   | Calculated from the beginning of CRT to death for any reasons or to cancer-related death, or the day of the last follow-up.                                                                                                                                |
|   |                                                         | Overall survival        | Rodel et al. (2018)<br>[28]        | Defined from the beginning of CRT to the day of death from any reasons.                                                                                                                                                                                    |
|   |                                                         | Overall survival        | Schernberg et al. (2017)<br>[29]   | The time between the diagnosis and the time of death.                                                                                                                                                                                                      |
|   |                                                         | Overall survival        | Martin et al. (2019)<br>[30]       | Calculated from start of CRT to the date of event or last follow-up. Assessed with death of any cause as the respective event.                                                                                                                             |
|   |                                                         | Overall survival        | Oehler-Janne et al. (2008)<br>[31] | Calculated from the beginning of RT to the day of death or the date of last follow-up.                                                                                                                                                                     |
|   |                                                         | Overall survival        | Susko et al. (2020)<br>[32]        | The time from last radiation treatment to date of death or last follow-up.                                                                                                                                                                                 |
|   |                                                         | Overall survival        | Cardenas et al. (2017)<br>[33]     | Not defined.                                                                                                                                                                                                                                               |
|   |                                                         | Overall survival        | Bitterman et al. (2015)<br>[34]    | The time from initiation of CRT to death due to any cause or most recent follow-up.                                                                                                                                                                        |
|   |                                                         | Overall survival        | Fraunholz et al. (2013)<br>[35]    | The time from start of CRT until death resulting from any cause, or the date of last follow-up visit.                                                                                                                                                      |
|   |                                                         | Overall survival        | Schernberg et al. (2017)*<br>[36]  | Not defined                                                                                                                                                                                                                                                |
|   |                                                         | Overall survival        | Hosni et al. (2018)<br>[37]        | Not defined                                                                                                                                                                                                                                                |
|   |                                                         | Overall survival        | Oblak et al. (2016)<br>[38]        | The time interval from the beginning of the treatment to the death due to any cause.                                                                                                                                                                       |
| 2 | Locoregional<br>failure (n=11)                          | Locoregional recurrence | Shakir et al. (2020)<br>[15]       | All failures at site of primary tumor, within the pelvis or inguinal nodes, with or without distant failure, including both patients who failed to achieve CR at 6 months and those occurring more than 6 months after completion of CRT after initial CR. |
|   |                                                         | Local failure           | Shakir et al. (2020)<br>[15]       | Persistence or recurrence at the site of initial primary tumor. The site of failure was determined based on physical examination, imaging, and pathology.                                                                                                  |
|   |                                                         | Regional failure        | Shakir et al. (2020)<br>[15]       | Persistence or recurrence elsewhere in the pelvis or inguinal nodes at any point. The site of failure was determined based on physical examination, imaging, and pathology.                                                                                |

|   |                              |                                              |                                   |                                                                                                                                                                                                                                     |
|---|------------------------------|----------------------------------------------|-----------------------------------|-------------------------------------------------------------------------------------------------------------------------------------------------------------------------------------------------------------------------------------|
|   |                              | Local relapse-free survival                  | Martin et al. (2020)<br>[21]      | Survival times were calculated from start of CRT to the date of respective events or last follow-up. Calculated using non-complete response at first restaging or locoregional recurrence after initial complete response as event. |
|   |                              | Locoregional failure                         | de Bellefon et al. (2020)<br>[22] | Calculated starting from the first day of radiotherapy and defined as follows: residual disease, local and/or regional recurrences.                                                                                                 |
|   |                              | Locoregional recurrence                      | Rouard et al. (2019)<br>[24]      | The time between the first day of RT and the date of first local or regional recurrence.                                                                                                                                            |
|   |                              | Local recurrence                             | Rouard et al. (2019)<br>[24]      | The time between the first day of RT and the date of local recurrence.                                                                                                                                                              |
|   |                              | Regional recurrence                          | Rouard et al. (2019)<br>[24]      | The time between the first day of RT and the date of regional recurrence.                                                                                                                                                           |
|   |                              | Local control                                | Call et al. (2016)<br>[26]        | Defined as the time to local relapse. *No definition for locoregional failure given. Local and regional failure definitions stated separately only.                                                                                 |
|   |                              | Regional control                             | Call et al. (2016)<br>[26]        | Defined as the time to regional relapse. *No definition for locoregional failure given. Local and regional failure definitions stated separately only.                                                                              |
|   |                              | Cumulative incidence of locoregional failure | Balermipas et al. (2017)<br>[27]  | Calculated from the beginning of CRT to non-complete response at restaging or locoregional tumor detection after initial complete response.                                                                                         |
|   |                              | Cumulative incidence of locoregional failure | Rodel et al. (2018)<br>[28]       | The time to non-complete response at restaging or locoregional tumour detection after initial complete response. All time-to-event end points were measured from the start of CRT.                                                  |
|   |                              | Locoregional control                         | Schernberg et al. (2017)<br>[29]  | The time between the diagnosis and the time of loco-regional recurrence.                                                                                                                                                            |
|   |                              | Locoregional control rate                    | Martin et al. (2019)<br>[30]      | Calculated from start of CRT to the date of event or last follow-up. Calculated using non-complete response at first restaging or locoregional recurrence after initial complete response as event.                                 |
|   |                              | Freedom from local recurrence                | Susko et al. (2020)<br>[32]       | The time from last radiation treatment to locally recurrent disease or last follow-up.                                                                                                                                              |
|   |                              | Locoregional control                         | Oblak et al. (2016)<br>[38]       | The time interval from the beginning of the treatment to the appearance of local and/or regional progression.                                                                                                                       |
| 3 | Disease-free survival (n=11) | Disease-free survival                        | Martin et al. (2020)<br>[21]      | Survival times were calculated from start of CRT to the date of respective events or last follow-up. Calculated using the date of diagnosis of locoregional failure, distant metastases, or death of any cause.                     |
|   |                              | Disease-free survival                        | de Bellefon et al. (2020)<br>[22] | Calculated starting from the first day of radiotherapy and defined as follows: death from any cause or recurrence.                                                                                                                  |
|   |                              | Progression-free survival                    | Brown et al. (2019)<br>[23]       | Comprises of locoregional failure (LRF), new distant metastatic disease and death, based on which occurred first.                                                                                                                   |
|   |                              | Disease-free survival                        | Rouard et al. (2019)<br>[24]      | The time between the first day of RT and the date of local, regional or metastatic recurrence or death, whichever occurred first.                                                                                                   |
|   |                              | Progression-free survival                    | Franco et al. (2018)<br>[25]      | The time interval between diagnosis and disease recurrence and/or progression at any site, death or lost at follow-up.                                                                                                              |
|   |                              | Disease-free survival                        | Balermipas et al. (2017)<br>[27]  | Measured from the beginning of CRT to the day of locoregional failure or distant recurrence, or death from any cause.                                                                                                               |
|   |                              | Progression-free survival                    | Schernberg et al. (2017)<br>[29]  | The time between the diagnosis and the time of recurrence or death.                                                                                                                                                                 |
|   |                              | Disease-free survival                        | Martin et al. (2019)<br>[30]      | Calculated from start of CRT to the date of event or last follow-up. Calculated using the date of diagnosis of locoregional failure, distant metastases, or death of any cause.                                                     |
|   |                              | Disease-free survival                        | Bitterman et al. (2015)<br>[34]   | The time from initiation of CRT to the occurrence of local, regional, or distant recurrence, death, or most recent follow-up.                                                                                                       |
|   |                              | Progression-free survival                    | Schernberg et al. (2017)*<br>[36] | Not defined                                                                                                                                                                                                                         |
|   |                              | Disease-free survival                        | Hosni et al. (2018)<br>[37]       | Not defined                                                                                                                                                                                                                         |

|   |                                          |                                            |                                 |                                                                                                                                                                                                                                                                            |
|---|------------------------------------------|--------------------------------------------|---------------------------------|----------------------------------------------------------------------------------------------------------------------------------------------------------------------------------------------------------------------------------------------------------------------------|
| 4 | <b>Distant failure (n=5)</b>             | Distant relapse                            | Shakir et al. (2020) [15]       | Development of disease outside of the pelvis or inguinal nodes independent of locoregional status at any point. Failure within the common iliac nodes was considered distant failure.                                                                                      |
|   |                                          | Distant control                            | Call et al. (2016) [26]         | Defined as the time to distant relapse.                                                                                                                                                                                                                                    |
|   |                                          | Cumulative incidence of distant metastases | Rodel et al. (2018) [28]        | Any occurrence of distant metastasis during CRT, at re-staging, or during follow-up. All time-to-event end points were measured from the start of CRT.                                                                                                                     |
|   |                                          | Freedom from distant metastasis            | Susko et al. (2020) [32]        | The time from last radiation treatment to distant recurrence of disease or last follow-up.                                                                                                                                                                                 |
|   |                                          | Distant metastases control                 | Schernberg et al. (2017)* [36]  | The time between the diagnosis and the time of distant metastasis.                                                                                                                                                                                                         |
| 5 | <b>Metastasis-free survival (n=5)</b>    | Distant metastasis-free survival           | Martin et al. (2020) [21]       | Survival times were calculated from start of CRT to the date of respective events or last follow-up. Calculated using the date of diagnosis of distant metastases or death of any cause as event.                                                                          |
|   |                                          | Metastasis-free survival                   | de Bellefon et al. (2020) [22]  | Calculated starting from the first day of radiotherapy and defined as follows: death or distant relapse.                                                                                                                                                                   |
|   |                                          | Distant metastasis-free survival           | Martin et al. (2019) [30]       | Calculated from start of CRT to the date of event or last follow-up. Calculated using the date of diagnosis of distant metastases or death of any cause as event.                                                                                                          |
|   |                                          | Distant metastases-free survival           | Fraunholz et al. (2013) [35]    | The time from the start of CRT to the diagnosis of distant metastases or to death, or the date of last follow-up visit.                                                                                                                                                    |
|   |                                          | Distant failure-free survival              | Schernberg et al. (2017)* [36]  | Not defined                                                                                                                                                                                                                                                                |
| 6 | <b>Freedom from disease (n=4)</b>        | Disease-free survival                      | Shakir et al. (2020) [15]       | Event defined as either a failure to achieve CR at 6 months or subsequent relapse (local, regional, or distant).                                                                                                                                                           |
|   |                                          | Time to failure                            | Shakir et al. (2020) [15]       | Interval from start of CRT to date of detection of recurrence. Last follow-up was considered the last clinic visit or date of death.                                                                                                                                       |
|   |                                          | Disease-free survival                      | Rodel et al. (2018) [28]        | Defined from the beginning of CRT to the day of locoregional failure or distant recurrence.                                                                                                                                                                                |
|   |                                          | Time to recurrence                         | Oehler-Janne et al. (2008) [31] | Calculated from the beginning of RT to the day of recurrence or the date of last follow-up.                                                                                                                                                                                |
|   |                                          | Disease-free survival                      | Oblak et al. (2016) [38]        | The time interval from the beginning of the treatment to the appearance of local and/or regional progression and/or appearance of distant metastases.                                                                                                                      |
| 7 | <b>Colostomy-free survival (n=4)</b>     | Colostomy-free survival                    | de Bellefon et al. (2020) [22]  | Calculated starting from the first day of radiotherapy and defined as follows: death or definitive colostomy. A colostomy performed before radiotherapy was considered as a failure on the first day of treatment as long as it was not reversed later on.                 |
|   |                                          | Colostomy-free survival                    | Call et al. (2016) [26]         | Defined as the time to the date of a colostomy procedure.                                                                                                                                                                                                                  |
|   |                                          | Colostomy-free survival                    | Bitterman et al. (2015) [34]    | Measured from initiation of CRT to diverting colostomy or salvage abdominoperineal resection (APR), death, or most recent follow-up without surgery.                                                                                                                       |
|   |                                          | Colostomy-free survival                    | Hosni et al. (2018) [37]        | Not defined                                                                                                                                                                                                                                                                |
| 8 | <b>Cancer-specific survival (n=3)</b>    | Cancer-specific survival                   | de Bellefon et al. (2020) [22]  | Calculated starting from the first day of radiotherapy and defined as follows: death from SCCAC.                                                                                                                                                                           |
|   |                                          | Cancer-specific survival                   | Fraunholz et al. (2013) [35]    | The time from start of CRT until death resulting from the cancer, or the date of last follow-up visit.                                                                                                                                                                     |
|   |                                          | Disease-specific survival                  | Oblak et al. (2016) [38]        | The time interval from the beginning of the treatment to the death because of cancer.                                                                                                                                                                                      |
| 9 | <b>Local failure-free survival (n=2)</b> | Local recurrence-free survival             | Cardenas et al. (2017) [33]     | Not defined.                                                                                                                                                                                                                                                               |
|   |                                          | Local failure-free survival                | Fraunholz et al. (2013) [35]    | The time from start of CRT to the first local tumor detection after CRT (ie. noncomplete response or local tumor recurrence after complete response) or to death (if the latter event occurred before a local failure was diagnosed), or the date of last follow-up visit. |

**Appendix E.** All outcomes reported in each study, along with all factors tested in both univariable and multivariable analysis.

| #  | Study                          | Outcomes                                                                                                                          | Factors identified as prognostic using univariable analysis                                                                                                                                                                                                                                                                                           | Factors identified as prognostic using multivariable analysis                                                                                                                      |
|----|--------------------------------|-----------------------------------------------------------------------------------------------------------------------------------|-------------------------------------------------------------------------------------------------------------------------------------------------------------------------------------------------------------------------------------------------------------------------------------------------------------------------------------------------------|------------------------------------------------------------------------------------------------------------------------------------------------------------------------------------|
| 1  | Shakir et al. (2020) [15]      | Locoregional recurrence, distant relapse, persistent disease, disease-free survival, overall survival                             | Sex, performance status, T stage, N stage, RT completion, chemotherapy type                                                                                                                                                                                                                                                                           | Sex, N stage, RT completion, performance status                                                                                                                                    |
| 2  | Martin et al. (2020) [21]      | Local relapse free survival, distant metastasis-free survival, disease-free survival, overall survival                            | T stage, N stage, gender, high grade acute organ toxicity                                                                                                                                                                                                                                                                                             | T stage, N stage, gender, high grade acute organ toxicity                                                                                                                          |
| 3  | de Bellefon et al. (2020) [22] | Locoregional failure, overall survival, colostomy-free survival, disease-free survival, metastasis-free survival                  | T stage, AJCC stage, N stage, exclusive RT, lack of MMC, RT breaks                                                                                                                                                                                                                                                                                    | T stage, N stage, AJCC stage, sex, RT breaks, exclusive RT, lack of MMC, residual disease                                                                                          |
| 4  | Brown et al. (2018) [23]       | Progression-free survival                                                                                                         | <i>N/A - No univariable analysis performed.</i>                                                                                                                                                                                                                                                                                                       | T stage, N stage, planned total RT dose, planned total RT fractions, Minimum CT value, GLCM entropy log10- PET, GLCM entropy log2- PET, NGLDM busyness- PET, total SMTV, total TLG |
| 5  | Rouard et al. (2019) [24]      | Overall survival, locoregional recurrence, local recurrence, regional recurrence                                                  | Age, immunodepression, definitive RT break, anal tumour boost technique, anal tumour total dose, performance status, active smoking, differentiation, lack of MMC, N stage, external iliac involvement at diagnosis, inguinal involvement at diagnosis, keratinisation, PLNA with NC delineation, involved LN not boosted, internal iliac delineation | Age, immunodepression, performance status, active smoking, external iliac involvement at diagnosis, PLNA with NC delineation                                                       |
| 6  | Franco et al. (2018) [25]      | Progression-free survival, overall survival                                                                                       | Sex, N stage, basal haemoglobin levels, response to treatment                                                                                                                                                                                                                                                                                         | Sex, N stage, basal haemoglobin levels, response to treatment                                                                                                                      |
| 7  | Call et al. (2016) [26]        | Overall survival, local control, regional control, distant control, colostomy-free survival                                       | N stage, T stage                                                                                                                                                                                                                                                                                                                                      | N stage, T stage, RT duration                                                                                                                                                      |
| 8  | Balermipas et al. (2017) [27]  | Cumulative incidence of locoregional failure, disease-free survival, overall survival                                             | Age, sex, T stage, N stage, HPV16 load, p16, CD8, PD-1, PD-L1, FOXP3, pCASP-8                                                                                                                                                                                                                                                                         | Age, sex, HPV16 load, p16, CD8, PD-1, PD-L1, FOXP3, pCASP-8                                                                                                                        |
| 9  | Rodel et al. (2018) [28]       | Cumulative incidence of locoregional failure, cumulative incidence of distant metastases, disease-free survival, overall survival | Gender, T stage, N stage, HPV16 load, RITA expression                                                                                                                                                                                                                                                                                                 | Gender, T stage, N stage, HPV16 load, RITA expression                                                                                                                              |
| 10 | Schernberg et al. (2017) [29]  | Overall survival, progression-free survival, locoregional control, distant metastases control                                     | Leukocytosis, neutrophilia, anaemia, sex, performance status                                                                                                                                                                                                                                                                                          | Leukocytosis, neutrophilia, anaemia, sex, performance status                                                                                                                       |
| 11 | Martin et al. (2019) [30]      | Locoregional control rate, disease-free survival, distant metastasis-free survival, overall survival                              | C reactive Protein to Albumin Ratio (CAR), gender, N stage                                                                                                                                                                                                                                                                                            | C reactive Protein to Albumin Ratio (CAR), N stage                                                                                                                                 |

|    |                                 |                                                                                                                |                                                                                                                                                                                                                                      |                                                                           |
|----|---------------------------------|----------------------------------------------------------------------------------------------------------------|--------------------------------------------------------------------------------------------------------------------------------------------------------------------------------------------------------------------------------------|---------------------------------------------------------------------------|
| 12 | Oehler-Janne et al. (2008) [31] | Overall survival, time to recurrence                                                                           | <i>N/A - No univariable analysis performed.</i>                                                                                                                                                                                      | N stage, severe acute skin toxicity                                       |
| 13 | Susko et al. (2020) [32]        | Freedom from local recurrence, freedom from distant metastasis, overall survival                               | T stage, time from diagnosis to RT initiation, RT duration                                                                                                                                                                           | T stage, time from diagnosis to RT initiation, RT duration                |
| 14 | Cardenas et al. (2017) [33]     | Local recurrence-free survival, overall survival                                                               | Pretreatment SUVmax, posttreatment SUVmax, $\Delta$ SUVmax, 5-FU/MMC chemotherapy, use of IMRT                                                                                                                                       | Posttreatment SUVmax, $\Delta$ SUVmax, 5-FU/MMC chemotherapy, use of IMRT |
| 15 | Bitterman et al. (2015) [34]    | Overall survival, disease-free survival, colostomy-free survival                                               | <i>N/A - No univariable analysis performed.</i>                                                                                                                                                                                      | T stage, use of IMRT                                                      |
| 16 | Fraunholz et al. (2013) [35]    | Local failure-free survival, distant metastases-free survival, cancer-specific survival, overall survival      | Sex, T stage, N stage, grade, EGFR expression                                                                                                                                                                                        | Sex, N stage, grade                                                       |
| 17 | Schernberg et al. (2017)* [36]  | Overall survival, progression-free survival, locoregional failure-free survival, distant failure-free survival | Leukocytosis, neutrophilia, anaemia, T stage, N stage, CRT duration                                                                                                                                                                  | Leukocytosis, neutrophilia, anaemia, N stage, CRT duration                |
| 18 | Hosni et al. (2018) [37]        | Colostomy-free survival, disease-free survival, colostomy-free survival                                        | <i>N/A - Univariable analysis performed but no significant prognostic factors identified</i>                                                                                                                                         | T stage, sex, age, anal canal cancer with perianal extension              |
| 19 | Oblak et al. (2016) [38]        | Locoregional control, disease-free survival, disease-specific survival, overall survival                       | Pretreatment Hb level, mean on-treatment Hb level, end-of-treatment Hb level, performance status, T stage, N stage, overall disease stage, histologic tumour type, tumour site, blood transfusion, overall radiation time, operation | Pre-treatment Hb level, overall disease stage                             |

**Appendix F.** Clinical factors identified as prognostic for worse outcomes through univariable and multivariable analysis, stratified by outcome. Where available, factor effects and parameterisation used for analysis are also included.

| Univariable analysis                                |                                     |                                      |                       |                               |                                       |                                |
|-----------------------------------------------------|-------------------------------------|--------------------------------------|-----------------------|-------------------------------|---------------------------------------|--------------------------------|
| Outcome<br>(number of studies<br>reporting outcome) | Risk factor                         | Times<br>identified as<br>prognostic | Total times<br>tested | Factor effect<br>(HR, 95% CI) | Note                                  | Study                          |
| Overall survival (n=17)                             | Higher N stage                      | 10                                   | 16                    | 3.40 (1.59-7.27)              | Multiple categories (N0,N1,N2,N3)     | Shakir et al. (2020) [15]      |
|                                                     |                                     |                                      |                       | N/A                           | N0 vs N+                              | Martin et al. (2020) [21]      |
|                                                     |                                     |                                      |                       | N/A                           | N0 vs N+                              | de Bellefon et al. (2020) [22] |
|                                                     |                                     |                                      |                       | 2.11 (1.31-2.90)              | N0 vs N+                              | Franco et al. (2018) [25]      |
|                                                     |                                     |                                      |                       | N/A                           | Multiple categories (N0,N1,N2,N3)     | Call et al. (2016) [26]        |
|                                                     |                                     |                                      |                       | N/A                           | N0 vs N+                              | Balermipas et al. (2017) [27]  |
|                                                     |                                     |                                      |                       | N/A                           | N0 vs N+                              | Rodel et al. (2018) [28]       |
|                                                     |                                     |                                      |                       | N/A                           | N0 vs N+                              | Fraunholz et al. (2013) [35]   |
|                                                     |                                     |                                      |                       | N/A                           | N0 vs N+                              | Schernberg et al. (2017)* [36] |
|                                                     |                                     |                                      |                       | N/A                           | N0 vs N+                              | Oblak et al. (2016) [38]       |
|                                                     | Higher T stage                      | 9                                    | 16                    | 4.15 (1.21-14.25)             | Multiple categories (T1,T2,T3,T4)     | Shakir et al. (2020) [15]      |
|                                                     |                                     |                                      |                       | N/A                           | T1-2 vs T3-4                          | Martin et al. (2020) [21]      |
|                                                     |                                     |                                      |                       | N/A                           | T1-2 vs T3-4                          | de Bellefon et al. (2020) [22] |
|                                                     |                                     |                                      |                       | N/A                           | T1-2 vs T3-4                          | Balermipas et al. (2017) [27]  |
|                                                     |                                     |                                      |                       | N/A                           | T1-2 vs T3-4                          | Rodel et al. (2018) [28]       |
|                                                     |                                     |                                      |                       | N/A                           | T1-2 vs T3-4                          | Fraunholz et al. (2013) [35]   |
|                                                     |                                     |                                      |                       | N/A                           | T1-2 vs T3-4                          | Schernberg et al. (2017)* [36] |
|                                                     |                                     |                                      |                       | 3.59 (1.30-9.88)              | T1-2 vs T3-4                          | Hosni et al. (2018) [37]       |
|                                                     |                                     |                                      |                       | N/A                           | T1-3 vs T4                            | Oblak et al. (2016) [38]       |
|                                                     | Male sex                            | 7                                    | 12                    | 2.93 (1.64-5.24)              | Female/Male                           | Shakir et al. (2020) [15]      |
|                                                     |                                     |                                      |                       | N/A                           | Female/Male                           | Martin et al. (2020) [21]      |
|                                                     |                                     |                                      |                       | 2.23 (1.42-3.05)              | Female/Male                           | Franco et al. (2018) [25]      |
|                                                     |                                     |                                      |                       | N/A                           | Female/Male                           | Balermipas et al. (2017) [27]  |
|                                                     |                                     |                                      |                       | N/A                           | Female/Male                           | Rodel et al. (2018) [28]       |
|                                                     |                                     |                                      |                       | N/A                           | Female/Male                           | Schernberg et al. (2017) [29]  |
|                                                     |                                     |                                      |                       | 3.38 (1.09-10.50)             | Female/Male                           | Hosni et al. (2018) [37]       |
|                                                     | Worse performance status            | 3                                    | 4                     | 11.61 (2.56-52.75)            | Multiple categories (PS0,PS1,PS2,PS3) | Shakir et al. (2020) [15]      |
|                                                     |                                     |                                      |                       | N/A                           | 0 vs 1/2                              | Schernberg et al. (2017) [29]  |
|                                                     |                                     |                                      |                       | N/A                           | 0 vs 1-3                              | Oblak et al. (2016) [38]       |
|                                                     | Older age                           | 3                                    | 4                     | 2.15 (1.16-3.98)              | <65 vs ≥65                            | Rouard et al. (2019) [24]      |
|                                                     |                                     |                                      |                       | N/A                           | ≤59 vs >59                            | Balermipas et al. (2017) [27]  |
|                                                     |                                     |                                      |                       | 1.05 (1.00-1.09)              | Continuous                            | Hosni et al. (2018) [37]       |
|                                                     | Incomplete/interrupted RT or breaks | 2                                    | 2                     | 6.21 (2.98-12.95)             | No/Yes                                | Shakir et al. (2020) [15]      |
|                                                     |                                     |                                      |                       | 3.25 (1.15-9.13)              | No/Yes                                | Rouard et al. (2019) [24]      |

|                             |                                           |   |    |                   |                                       |                                |
|-----------------------------|-------------------------------------------|---|----|-------------------|---------------------------------------|--------------------------------|
|                             | Longer CRT duration                       | 2 | 5  | N/A               | No/Yes                                | Schernberg et al. (2017)* [36] |
|                             |                                           |   |    | N/A               | ≤ 1.08 months vs > 1.08 months        | Oblak et al. (2016) [38]       |
|                             | Immunodepression                          | 1 | 1  | 3.70 (1.30-10.51) | Yes/No                                | Rouard et al. (2019) [24]      |
|                             | External RT                               | 1 | 2  | 2.38 (1.05-5.55)  | Brachytherapy vs External RT          | Rouard et al. (2019) [24]      |
|                             | Lower anal tumour total dose              | 1 | 3  | 2.04 (1.04-4.00)  | ≥64Gy vs <64Gy                        | Rouard et al. (2019) [24]      |
|                             | No response to treatment                  | 1 | 1  | 6.26 (2.73-14.40) | Yes/No                                | Franco et al. (2018) [25]      |
|                             | Diagnosis to RT initiation                | 1 | 1  | 1.02 (1.00-1.04)  | Continuous                            | Susko et al. (2020) [32]       |
|                             | Lack of 5-FU/MMC chemotherapy             | 1 | 1  | 12.5              | No/Yes                                | Cardenas et al. (2017) [33]    |
|                             | Higher tumour grade                       | 1 | 5  | N/A               | G1-2 vs G3                            | Fraunholz et al. (2013) [35]   |
|                             | Anal canal cancer with perianal extension | 1 | 1  | 3.04 (1.10-8.38)  | No/Yes                                | Hosni et al. (2018) [37]       |
|                             | Larger maximum primary tumor size         | 1 | 3  | 1.16 (1.02-1.32)  | Continuous                            | Hosni et al. (2018) [37]       |
|                             | Higher AJCC stage                         | 1 | 1  | N/A               | I/II vs IIIA/IIIB                     | Oblak et al. (2016) [38]       |
|                             | Histologic tumour type                    | 1 | 2  | N/A               | Basaloid vs squamous                  | Oblak et al. (2016) [38]       |
|                             | Blood transfusion                         | 1 | 1  | N/A               | No/Yes                                | Oblak et al. (2016) [38]       |
|                             | Operation                                 | 1 | 1  | N/A               | No/Yes                                | Oblak et al. (2016) [38]       |
| Locoregional failure (n=11) | Higher N stage                            | 7 | 11 | 3.05 (1.63-5.73)  | Multiple categories (N0,N1,N2,N3)     | Shakir et al. (2020) [15]      |
|                             |                                           |   |    | N/A               | N0 vs N+                              | Martin et al. (2020) [21]      |
|                             |                                           |   |    | N/A               | Multiple categories (N0,N1,N2,N3)     | Call et al. (2016) [26]        |
|                             |                                           |   |    | N/A               | N0 vs N+                              | Balermipas et al. (2017) [27]  |
|                             |                                           |   |    | N/A               | N0 vs N+                              | Rodel et al. (2018) [28]       |
|                             |                                           |   |    | N/A               | N0 vs N+                              | Martin et al. (2019) [30]      |
|                             | Higher T stage                            | 7 | 11 | N/A               | N0 vs N+                              | Oblak et al. (2016) [38]       |
|                             |                                           |   |    | 5.17 (1.55-17.28) | Multiple categories (T1,T2,T3,T4)     | Shakir et al. (2020) [15]      |
|                             |                                           |   |    | N/A               | T1-2 vs T3-4                          | Martin et al. (2020) [21]      |
|                             |                                           |   |    | N/A               | T1-2 vs T3-4                          | Call et al. (2016) [26]        |
|                             |                                           |   |    | N/A               | T1-2 vs T3-4                          | Balermipas et al. (2017) [27]  |
|                             |                                           |   |    | N/A               | T1-2 vs T3-4                          | Rodel et al. (2018) [28]       |
|                             | Male sex                                  | 5 | 9  | 4.43 (1.93-10.16) | Multiple categories (T1,T2,T3,T4)     | Susko et al. (2020) [32]       |
|                             |                                           |   |    | N/A               | T1-3 vs T4                            | Oblak et al. (2016) [38]       |
|                             |                                           |   |    | 1.78 (1.09-2.91)  | Female/Male                           | Shakir et al. (2020) [15]      |
|                             |                                           |   |    | N/A               | Female/Male                           | Martin et al. (2020) [21]      |
|                             |                                           |   |    | N/A               | Female/Male                           | Balermipas et al. (2017) [27]  |
|                             | Worse performance status                  | 4 | 4  | N/A               | Female/Male                           | Rodel et al. (2018) [28]       |
|                             |                                           |   |    | N/A               | Female/Male                           | Schernberg et al. (2017) [29]  |
|                             |                                           |   |    | 1.90 (1.14-3.19)  | Multiple categories (PS0,PS1,PS2,PS3) | Shakir et al. (2020) [15]      |
|                             |                                           |   |    | 3.01 (1.05-8.66)  | No/Yes                                | Rouard et al. (2019) [24]      |
|                             | Longer RT duration                        | 2 | 2  | N/A               | 0 or 1 vs ≥2                          | Schernberg et al. (2017) [29]  |
|                             |                                           |   |    | N/A               | 0 vs 1-3                              | Oblak et al. (2016) [38]       |
|                             | Incomplete/interrupted RT                 | 1 | 2  | 1.05 (1.02-1.08)  | Continuous                            | Susko et al. (2020) [32]       |
|                             | Active smoking                            | 1 | 1  | N/A               | ≤ 1.08 months vs > 1.08 months        | Oblak et al. (2016) [38]       |
|                             | Differentiation                           | 1 | 1  | 5.29 (2.83-9.90)  | No/Yes                                | Shakir et al. (2020) [15]      |
|                             |                                           |   |    | 2.22 (1.07-4.61)  | No/Yes                                | Rouard et al. (2019) [24]      |
|                             |                                           |   |    | 4.31 (1.25-14.89) | Poorly/moderately/well differentiated | Rouard et al. (2019) [24]      |

|                                       |                                             |   |    |                   |                              |                                |
|---------------------------------------|---------------------------------------------|---|----|-------------------|------------------------------|--------------------------------|
|                                       | Lack of MMC chemotherapy                    | 1 | 1  | 2.56 (1.16-5.88)  | Yes/No                       | Rouard et al. (2019) [24]      |
|                                       | Immunodepression                            | 1 | 1  | 3.54 (1.06-11.83) | No/Yes                       | Rouard et al. (2019) [24]      |
|                                       | External RT                                 | 1 | 1  | 3.57 (1.05-12.5)  | Brachytherapy vs External RT | Rouard et al. (2019) [24]      |
|                                       | Higher number of involved LN at diagnosis   | 1 | 1  | 3.69 (1.24-11.04) | <2 vs ≥2                     | Rouard et al. (2019) [24]      |
|                                       | External iliac involvement at diagnosis     | 1 | 1  | 4.65 (1.55-13.93) | No/Yes                       | Rouard et al. (2019) [24]      |
|                                       | Inguinal involvement at diagnosis           | 1 | 1  | 3.16 (1.10-9.11)  | No/Yes                       | Rouard et al. (2019) [24]      |
|                                       | No keratinisation                           | 1 | 1  | 3.13 (1.03-9.10)  | Yes/No                       | Rouard et al. (2019) [24]      |
|                                       | Higher PLNA with NC delineation             | 1 | 1  | 5.77 (1.29-25.78) | <10 vs ≥10                   | Rouard et al. (2019) [24]      |
|                                       | Higher number of involved LN not boosted    | 1 | 1  | 3.30 (1.03-10.52) | 0 or 1 vs ≥2                 | Rouard et al. (2019) [24]      |
|                                       | NC Internal iliac delineation               | 1 | 1  | 4.20(1.17-15.08)  | Conforming vs NC             | Rouard et al. (2019) [24]      |
|                                       | Longer time to RT initiation from diagnosis | 1 | 1  | 1.05 (1.02-1.08)  | Continuous                   | Susko et al. (2020) [32]       |
|                                       | Higher AJCC stage                           | 1 | 1  | N/A               | I/II vs IIIA/IIIB            | Oblak et al. (2016) [38]       |
|                                       | Squamous histologic tumour type             | 1 | 1  | N/A               | Basaloid vs squamous         | Oblak et al. (2016) [38]       |
|                                       | Operation                                   | 1 | 1  | N/A               | No/Yes                       | Oblak et al. (2016) [38]       |
| <b>Disease-free survival (n=11)</b>   | Male sex                                    | 5 | 8  | N/A               | Female/Male                  | Martin et al. (2020) [21]      |
|                                       |                                             |   |    | N/A               | Female/Male                  | Balermipas et al. (2017) [27]  |
|                                       |                                             |   |    | N/A               | Female/Male                  | Schernberg et al. (2017) [29]  |
|                                       |                                             |   |    | N/A               | Female/Male                  | Martin et al. (2019) [30]      |
|                                       |                                             |   |    | 2.33 (1.00-5.46)  | Female/Male                  | Hosni et al. (2018) [37]       |
|                                       | Higher N stage                              | 4 | 9  | N/A               | N0 vs N+                     | Martin et al. (2020) [21]      |
|                                       |                                             |   |    | N/A               | N0 vs N+                     | de Bellefon et al. (2020) [22] |
|                                       |                                             |   |    | N/A               | N0 vs N+                     | Balermipas et al. (2017) [27]  |
|                                       |                                             |   |    | N/A               | N0 vs N+                     | Martin et al. (2019) [30]      |
|                                       | Higher T stage                              | 4 | 10 | N/A               | T1-2 vs T3-4                 | Martin et al. (2020) [21]      |
|                                       |                                             |   |    | N/A               | T1-2 vs T3-4                 | de Bellefon et al. (2020) [22] |
|                                       |                                             |   |    | N/A               | T1-2 vs T3-4                 | Rodel et al. (2018) [28]       |
|                                       |                                             |   |    | 6.25 (2.70-17.40) | T1-2 vs T3-4                 | Hosni et al. (2018) [37]       |
|                                       | Worse performance status                    | 1 | 2  | N/A               | 0 vs 1/2                     | Schernberg et al. (2017) [29]  |
|                                       | High grade acute organ toxicity             | 1 | 1  | N/A               | No/Yes                       | Martin et al. (2020) [21]      |
|                                       | Anal canal cancer with perianal extension   | 1 | 1  | 2.92 (1.26-6.75)  | No/Yes                       | Hosni et al. (2018) [37]       |
|                                       | Larger maximum primary tumor size           | 1 | 2  | 1.23 (1.12-1.34)  | Continuous                   | Hosni et al. (2018) [37]       |
| <b>Distant failure (n=5)</b>          | Male sex                                    | 1 | 3  | N/A               | Female/Male                  | Rodel et al. (2018) [28]       |
|                                       | Higher T stage                              | 1 | 5  | N/A               | T1-2 vs T3-4                 | Rodel et al. (2018) [28]       |
|                                       | Higher N stage                              | 1 | 5  | N/A               | N0 vs N+                     | Rodel et al. (2018) [28]       |
|                                       | Worse performance status                    | 1 | 1  | N/A               | 0 vs 1/2                     | Schernberg et al. (2017) [29]  |
| <b>Metastasis-free survival (n=5)</b> | Higher T stage                              | 5 | 5  | N/A               | T1-2 vs T3-4                 | Martin et al. (2020) [21]      |
|                                       |                                             |   |    | N/A               | T1-2 vs T3-4                 | de Bellefon et al. (2020) [22] |
|                                       |                                             |   |    | N/A               | T1-2 vs T3-4                 | Martin et al. (2019) [30]      |
|                                       |                                             |   |    | N/A               | T1-2 vs T3-4                 | Fraunholz et al. (2013) [35]   |
|                                       |                                             |   |    | N/A               | T1-2 vs T3-4                 | Schernberg et al. (2017)* [36] |



|                                   |                                           |   |   |                   |                                       |                                 |
|-----------------------------------|-------------------------------------------|---|---|-------------------|---------------------------------------|---------------------------------|
|                                   | Higher N stage                            | 4 | 5 | N/A               | N0 vs N+                              | Martin et al. (2020) [21]       |
|                                   |                                           |   |   | N/A               | N0 vs N+                              | Martin et al. (2019) [30]       |
|                                   |                                           |   |   | N/A               | N0 vs N+                              | Fraunholz et al. (2013) [35]    |
|                                   |                                           |   |   | N/A               | N0 vs N+                              | Schernberg et al. (2017)* [36]  |
|                                   | Male sex                                  | 2 | 4 | N/A               | Female/Male                           | Martin et al. (2020) [21]       |
|                                   | Higher tumour grade                       | 1 | 3 | N/A               | In HIV- patients only                 | Fraunholz et al. (2013) [35]    |
| Freedom from disease (n=4)        | Longer CRT duration                       | 1 | 1 | N/A               | <50 days vs >50 days                  | Schernberg et al. (2017)* [36]  |
|                                   | Higher N stage                            | 4 | 4 | 4.02 (2.25-7.17)  | Multiple categories (N0,N1,N2,N3)     | Shakir et al. (2020) [15]       |
|                                   |                                           |   |   | N/A               | N0 vs N+                              | Rodel et al. (2018) [28]        |
|                                   |                                           |   |   | N/A               | N0 vs N+                              | Oblak et al. (2016) [38]        |
|                                   |                                           |   |   | N/A               | In HIV- patients                      | Oehler-Janne et al. (2008) [31] |
|                                   | Male sex                                  | 2 | 3 | 1.85 (1.18-2.92)  | Female/Male                           | Shakir et al. (2020) [15]       |
|                                   |                                           |   |   | N/A               | Female/Male                           | Rodel et al. (2018) [28]        |
|                                   | Higher T stage                            | 2 | 3 | 4.48 (1.56-12.87) | Multiple categories (T1,T2,T3,T4)     | Shakir et al. (2020) [15]       |
|                                   |                                           |   |   | N/A               | T1-3 vs T4                            | Oblak et al. (2016) [38]        |
|                                   | Worse performance status                  | 1 | 3 | 1.94 (1.21-3.12)  | Multiple categories (PS0,PS1,PS2,PS3) | Shakir et al. (2020) [15]       |
|                                   | Incomplete/interrupted RT                 | 1 | 1 | 4.98 (2.74-9.05)  | No/Yes                                | Shakir et al. (2020) [15]       |
|                                   | Severe acute skin toxicity                | 1 | 1 | N/A               | No/Yes In HIV- patients               | Oehler-Janne et al. (2008) [31] |
|                                   | Higher AJCC stage                         | 1 | 1 | N/A               | I/II vs IIIA/IIIB                     | Oblak et al. (2016) [38]        |
|                                   | Squamous histologic tumour type           | 1 | 2 | N/A               | Basaloid vs squamous                  | Oblak et al. (2016) [38]        |
|                                   | Longer overall radiation time             | 1 | 1 | N/A               | ≤ 1.08 months vs > 1.08 months        | Oblak et al. (2016) [38]        |
|                                   | Operation                                 | 1 | 1 | N/A               | No/Yes                                | Oblak et al. (2016) [38]        |
| Colostomy-free survival (n=4)     | Higher T stage                            | 3 | 4 | N/A               | T3-4 vs T1-2                          | de Bellefon et al. (2020) [22]  |
|                                   |                                           |   |   | N/A               | T3-4 vs T1-2                          | Call et al. (2016) [26]         |
|                                   |                                           |   |   | 3.83 (1.68-8.77)  | T3-4 vs T1-2                          | Hosni et al. (2018) [37]        |
|                                   | Anal canal cancer with perianal extension | 1 | 1 | 3.47 (1.56-7.74)  | No/Yes                                | Hosni et al. (2018) [37]        |
| Cancer-specific survival (n=3)    | Larger maximum primary tumour size        | 1 | 1 | 1.18 (1.08-1.29)  | Continuous                            | Hosni et al. (2018) [37]        |
|                                   | Higher T stage                            | 2 | 3 | N/A               | T1-2 vs T3-4                          | Fraunholz et al. (2013) [35]    |
|                                   |                                           |   |   | N/A               | T1-3 vs T4                            | Oblak et al. (2016) [38]        |
|                                   | Higher N stage                            | 2 | 3 | N/A               | N0 vs N+                              | Fraunholz et al. (2013) [35]    |
|                                   |                                           |   |   | N/A               | N0 vs N+                              | Oblak et al. (2016) [38]        |
|                                   | Higher tumour grade                       | 1 | 1 | N/A               | G1-2 vs G3                            | Fraunholz et al. (2013) [35]    |
|                                   | Higher AJCC stage                         | 1 | 3 | N/A               | I/II vs IIIA/IIIB                     | Oblak et al. (2016) [38]        |
| Local failure-free survival (n=2) | Longer overall radiation time             | 1 | 1 | N/A               | ≤ 1.08 months vs > 1.08 months        | Oblak et al. (2016) [38]        |
|                                   | Operation                                 | 1 | 1 | N/A               | No/Yes                                | Oblak et al. (2016) [38]        |
|                                   | Lack of 5-FU/MMC chemotherapy             | 1 | 1 | 4.76              | No/Yes                                | Cardenas et al. (2017) [33]     |
|                                   | Lack of IMRT radiotherapy                 | 1 | 1 | 5.56              | No/Yes                                | Cardenas et al. (2017) [33]     |
|                                   | Male sex                                  | 1 | 1 | N/A               | Female/Male                           | Fraunholz et al. (2013) [35]    |
|                                   | Higher T stage                            | 1 | 2 | N/A               | T1-2 vs T3-4                          | Fraunholz et al. (2013) [35]    |
|                                   | Higher N stage                            | 1 | 2 | N/A               | N0 vs N+                              | Fraunholz et al. (2013) [35]    |
|                                   | Higher tumour grade                       | 1 | 1 | N/A               | G1-2 vs G3                            | Fraunholz et al. (2013) [35]    |

| Multivariable analysis                        |                                     |                                |                            |                                       |                                |
|-----------------------------------------------|-------------------------------------|--------------------------------|----------------------------|---------------------------------------|--------------------------------|
| Outcome (number of studies reporting outcome) | Factor                              | Times identified as prognostic | Factor effect (HR, 95% CI) | Note                                  | Study                          |
| Overall survival (n=17)                       | Male sex                            | 7                              | 4.00 (2.11-7.56)           | Female/Male                           | Shakir et al. (2020) [15]      |
|                                               |                                     |                                | 1.92 (1.10-3.45)           | Female/Male                           | Martin et al. (2020) [21]      |
|                                               |                                     |                                | 3.66 (1.56-8.60)           | Female/Male                           | Franco et al. (2018) [25]      |
|                                               |                                     |                                | 3.13 (1.47-6.66)           | Female/Male                           | Balermipas et al. (2017) [27]  |
|                                               |                                     |                                | 3.05 (1.42-6.55)           | Female/Male                           | Rodel et al. (2018) [28]       |
|                                               |                                     |                                | 4.80 (1.60-14.50)          | Female/Male                           | Schernberg et al. (2017) [29]  |
|                                               |                                     |                                | 4.50 (1.42-14.27)          | Female/Male                           | Hosni et al. (2018) [37]       |
|                                               | Higher T stage                      | 3                              | 4.91 (2.25-10.72)          | T1-2 vs T3-4                          | de Bellefon et al. (2020) [22] |
|                                               |                                     |                                | 2.88 (1.12-7.46)           | T1-2 vs T3-4                          | Bitterman et al. (2015) [34]   |
|                                               |                                     |                                | 4.98 (1.69-14.72)          | T1-2 vs T3-4                          | Hosni et al. (2018) [37]       |
|                                               | Older age                           | 3                              | 2.43 (1.29-4.60)           | <65 vs ≥65                            | Rouard et al. (2019) [24]      |
|                                               |                                     |                                | 2.32 (1.13-4.73)           | ≤59 vs >59                            | Balermipas et al. (2017) [27]  |
|                                               |                                     |                                | 1.05 (1.00-1.09)           | Continuous                            | Hosni et al. (2018) [37]       |
|                                               | Higher N stage                      | 3                              | 2.25 (1.00-5.17)           | N0 vs N+                              | Franco et al. (2018) [25]      |
|                                               |                                     |                                | 1.88 (1.16-3.10)           | Multiple categories (N0,N1,N2,N3)     | Call et al. (2016) [26]        |
|                                               |                                     |                                | 5.80                       | N0 vs N+                              | Schernberg et al. (2017)* [36] |
|                                               | Higher AJCC stage                   | 2                              | 2.82 (1.22-6.53)           | I/II/III vs IV                        | de Bellefon et al. (2020) [22] |
|                                               |                                     |                                | 2.23 (1.17-4.26)           | I/II vs IIIA/IIIB                     | Oblak et al. (2016) [38]       |
|                                               | Worse performance status            | 1                              | 10.71 (1.94-58.95)         | Multiple categories (PS0,PS1,PS2,PS3) | Shakir et al. (2020) [15]      |
|                                               | Incomplete/interrupted RT           | 1                              | 4.22 (1.78-10.00)          | No/Yes                                | Shakir et al. (2020) [15]      |
|                                               | Exclusive RT                        | 1                              | 3.38 (1.29-10.72)          | No/Yes                                | de Bellefon et al. (2020) [22] |
|                                               | Lack of MMC                         | 1                              | 1.88 (0.92-3.85)           | No/Yes                                | de Bellefon et al. (2020) [22] |
|                                               | Immunodepression                    | 1                              | 5.05 (1.72-14.80)          | No/Yes                                | Rouard et al. (2019) [24]      |
|                                               | No response to treatment            | 1                              | 6.96 (2.96-16.50)          | Yes/No                                | Franco et al. (2018) [25]      |
|                                               | Longer diagnosis to RT initiation   | 1                              | 1.02 (1.00-1.05)           | Continuous                            | Susko et al. (2020) [32]       |
|                                               | Lack of 5-FU/MMC chemotherapy       | 1                              | 9.09                       | No/Yes                                | Cardenas et al. (2017) [33]    |
|                                               | Lack of IMRT radiotherapy           | 1                              | 4.00 (1.30-12.5)           | No/Yes                                | Bitterman et al. (2015) [34]   |
| Locoregional failure (n=11)                   | Male sex                            | 4                              | 2.08 (1.24-3.48)           | Female/Male                           | Shakir et al. (2020) [15]      |
|                                               |                                     |                                | 2.22 (1.16-4.38)           | Female/Male                           | Martin et al. (2020) [21]      |
|                                               |                                     |                                | 2.56 (1.04-6.25)           | Female/Male                           | Balermipas et al. (2017) [27]  |
|                                               |                                     |                                | 3.40 (1.30-9.40)           | Female/Male                           | Schernberg et al. (2017) [29]  |
|                                               | Higher N stage                      | 3                              | 2.23 (1.13-4.39)           | Multiple categories (N0,N1,N2,N3)     | Shakir et al. (2020) [15]      |
|                                               |                                     |                                | 3.00 (1.55-5.81)           | N0 vs N+                              | Martin et al. (2020) [21]      |
|                                               |                                     |                                | 3.58 (1.25-10.26)          | N0 vs N+                              | Martin et al. (2019) [30]      |
|                                               | Incomplete/interrupted RT or breaks | 2                              | 4.96 (2.40-10.27)          | No/Yes                                | Shakir et al. (2020) [15]      |

|                                |                                             |   |                   |                                                                         |                                |
|--------------------------------|---------------------------------------------|---|-------------------|-------------------------------------------------------------------------|--------------------------------|
|                                |                                             |   | 2.47 (1.15-5.30)  | No/Yes                                                                  | de Bellefon et al. (2020) [22] |
|                                | Worse performance status                    | 2 | 3.82 (1.31-11.09) | <2 vs ≥2                                                                | Rouard et al. (2019) [24]      |
|                                |                                             |   | 5.50 (2.20-14.00) | 0 vs 1/2                                                                | Schernberg et al. (2017) [29]  |
|                                | Exclusive RT                                | 1 | 3.41 (1.21-9.57)  | No/Yes                                                                  | de Bellefon et al. (2020) [22] |
|                                | Lack of MMC                                 | 1 | 3.11 (1.28-7.56)  | No/Yes                                                                  | de Bellefon et al. (2020) [22] |
|                                | Active smoking                              | 1 | 2.31 (1.11-4.82)  | No/Yes                                                                  | Rouard et al. (2019) [24]      |
|                                | Immunodepression                            | 1 | 7.25 (1.54-34.20) | No/Yes                                                                  | Rouard et al. (2019) [24]      |
|                                | External iliac involvement at diagnosis     | 1 | 7.89 (2.54-24.56) | No/Yes                                                                  | Rouard et al. (2019) [24]      |
|                                | Higher PLNA with NC delineation             | 1 | 9.09 (1.96-42.15) | <10 vs ≥10                                                              | Rouard et al. (2019) [24]      |
|                                | Higher T stage                              | 1 | 4.37 (1.83-10.47) | Multiple categories (T1,T2,T3,T4)                                       | Susko et al. (2020) [32]       |
|                                | Longer time to RT initiation from diagnosis | 1 | 1.06 (1.03-1.010) | Continuous                                                              | Susko et al. (2020) [32]       |
| Disease-free survival (n=11)   | Male sex                                    | 4 | 2.13 (1.19-3.85)  | Female/Male                                                             | Martin et al. (2020) [21]      |
|                                |                                             |   | 2.27 (2.38-4.35)  | Female/Male                                                             | Balermipas et al. (2017) [27]  |
|                                |                                             |   | 3.60 (1.50-8.60)  | Female/Male                                                             | Schernberg et al. (2017) [29]  |
|                                |                                             |   | 2.46 (1.04-5.73)  | Female/Male                                                             | Hosni et al. (2018) [37]       |
|                                | Higher T stage                              | 3 | 2.57 (1.42-4.66)  | Categorical                                                             | de Bellefon et al. (2020) [22] |
|                                |                                             |   | 7.02 (2.76-17.83) | T1-2 vs T3-4                                                            | Hosni et al. (2018) [37]       |
|                                |                                             |   | NA                | Multiple categories (T1,T2,T3,T4), variable weighting reported (-0.011) | Brown et al. (2019) [23]       |
|                                | Higher N stage                              | 2 | 3.06 (1.70-5.49)  | N0 vs N+                                                                | Martin et al. (2020) [21]      |
|                                |                                             |   | NA                | Multiple categories (N0,N1,N2,N3), variable weighting reported (-0.019) | Brown et al. (2019) [23]       |
|                                | Lower planned total RT dose                 | 1 | NA                | Continuous, variable weighting reported (0.007)                         | Brown et al. (2019) [23]       |
|                                | Fewer planned total RT fractions            | 1 | NA                | Continuous, variable weighting reported (0.012)                         | Brown et al. (2019) [23]       |
|                                | High grade acute organ toxicity             | 1 | 2.13 (1.20-3.70)  | No/Yes                                                                  | Martin et al. (2020) [21]      |
|                                | Higher AJCC stage                           | 1 | 2.23 (0.99-5.01)  | I/II/III vs IV                                                          | de Bellefon et al. (2020) [22] |
|                                | Worse performance status                    | 1 | 4.90 (2.10-11.50) | 0 vs 1/2                                                                | Schernberg et al. (2017) [29]  |
|                                | Longer CRT duration                         | 1 | 33.33             | <50 days vs >50 days                                                    | Schernberg et al. (2017)* [36] |
| Distant failure (n=5)          | Male sex                                    | 1 | 3.83 (1.20-12.27) | Female/Male                                                             | Rodel et al. (2018) [28]       |
|                                | Higher T stage                              | 1 | 4.24 (1.43-12.57) | T1-2 vs T3-4                                                            | Rodel et al. (2018) [28]       |
| Metastasis-free survival (n=5) | Male sex                                    | 2 | 4.08 (1.63-10.19) | Female/Male                                                             | Martin et al. (2020) [21]      |
|                                |                                             |   | 3.87 (1.08-13.84) | Female/Male                                                             | Fraunholz et al. (2013) [35]   |
|                                | Higher T stage                              | 2 | 3.54 (1.52-8.23)  | T1-2 vs T3-4                                                            | Martin et al. (2020) [21]      |
|                                |                                             |   | 2.61 (1.45-4.70)  | T1-2 vs T3-4                                                            | de Bellefon et al. (2020) [22] |
|                                | Higher N stage                              | 2 | 2.41 (1.0405.62)  | N0 vs N+                                                                | Martin et al. (2020) [21]      |
|                                |                                             |   | 4.49 (1.20-16.80) | N0 vs N+                                                                | Martin et al. (2019) [30]      |
|                                | Higher AJCC stage                           | 1 | 3.05 (1.41-6.62)  | I/II/III vs IV                                                          | de Bellefon et al. (2020) [22] |
| Freedom from disease (n=4)     | Higher tumour grade                         | 1 | 5.88 (1.72-20.00) | G1-2 vs G3                                                              | Fraunholz et al. (2013) [35]   |
|                                | Male sex                                    | 2 | 2.16 (1.34-3.48)  | Female/Male                                                             | Shakir et al. (2020) [15]      |
|                                |                                             |   | 2.16 (1.09-4.26)  | Female/Male                                                             | Rodel et al. (2018) [28]       |
|                                | Higher N stage                              | 1 | 2.73 (1.43-5.21)  | Multiple categories (N0,N1,N2,N3)                                       | Shakir et al. (2020) [15]      |
|                                | Incomplete/interrupted RT                   | 1 | 4.50 (2.26-8.97)  | No/Yes                                                                  | Shakir et al. (2020) [15]      |

|                                       |                                           |   |                   |                   |                                |
|---------------------------------------|-------------------------------------------|---|-------------------|-------------------|--------------------------------|
| <b>Colostomy-free survival (n=4)</b>  | Higher T stage                            | 3 | 4.10 (2.23-7.52)  | T1-2 vs T3-4      | de Bellefon et al. (2020) [22] |
|                                       |                                           |   | 4.00 (1.03-17.09) | T1-2 vs T3-4      | Call et al. (2016) [26]        |
|                                       |                                           |   | 3.65 (1.59-8.37)  | T1-2 vs T3-4      | Hosni et al. (2018) [37]       |
|                                       | Male sex                                  | 1 | 1.90 (1.10-3.10)  | Female/Male       | de Bellefon et al. (2020) [22] |
|                                       | Residual disease                          | 1 | 7.78 (3.41-17.77) | No/Yes            | de Bellefon et al. (2020) [22] |
|                                       | Exclusive RT                              | 1 | 3.03 (1.39-6.57)  | No/Yes            | de Bellefon et al. (2020) [22] |
| <b>Cancer-specific survival (n=3)</b> | Anal canal cancer with perianal extension | 1 | 3.17 (1.42-7.09)  | No/Yes            | Hosni et al. (2018) [37]       |
|                                       | Male sex                                  | 1 | 4.13 (1.24-13.63) | Female/Male       | Fraunholz et al. (2013) [35]   |
|                                       | Higher N stage                            | 1 | 6.25 (1.51-25.00) | N0 vs N+          | Fraunholz et al. (2013) [35]   |
|                                       | Higher AJCC stage                         | 1 | 3.52 (1.38-9.03)  | I/II vs IIIA/IIIB | Oblak et al. (2016) [38]       |

**Appendix G.** Biomarkers identified as prognostic for worse outcomes through univariable and multivariable analysis, stratified by outcome. Where available, factor effects and parameterisation used for analysis are also included.

| Univariable analysis                                      |                                            |                                         |                       |                               |                                                        |                                |
|-----------------------------------------------------------|--------------------------------------------|-----------------------------------------|-----------------------|-------------------------------|--------------------------------------------------------|--------------------------------|
| Outcome<br>(number of<br>studies<br>reporting<br>outcome) | Factor                                     | Times<br>identified<br>as<br>prognostic | Total times<br>tested | Factor effect<br>(HR, 95% CI) | Note                                                   | Study                          |
| Overall survival<br>(n=17)                                | Lower HPV16 load                           | 2                                       | 3                     | N/A                           | >≤ median                                              | Balermipas et al. (2017) [27]  |
|                                                           |                                            |                                         |                       | N/A                           | >≤ median                                              | Rodel et al. (2018) [28]       |
|                                                           | Neutrophilia                               | 2                                       | 2                     | N/A                           | Absent vs present (neutrophils >7G/L)                  | Schernberg et al. (2017) [29]  |
|                                                           |                                            |                                         |                       | N/A                           | Absent vs present (neutrophils >7500/mm <sup>3</sup> ) | Schernberg et al. (2017)* [36] |
|                                                           | Anaemia                                    | 2                                       | 2                     | N/A                           | Absent vs present (hemoglobin count < 13.0 g/dL)       | Schernberg et al. (2017) [29]  |
|                                                           |                                            |                                         |                       | N/A                           | Absent vs present (hemoglobin count < 13.0 g/dL)       | Schernberg et al. (2017)* [36] |
|                                                           | Lower basal heamoglobin levels             | 1                                       | 1                     | 2.00 (1.20-3.33)              | Continuous                                             | Franco et al. (2018) [25]      |
|                                                           | Lower CD8 expression                       | 1                                       | 1                     | N/A                           | >≤ median                                              | Balermipas et al. (2017) [27]  |
|                                                           | Lower PD-1 expression                      | 1                                       | 1                     | N/A                           | >≤ median                                              | Balermipas et al. (2017) [27]  |
|                                                           | Lower RITA expression                      | 1                                       | 1                     | N/A                           | >≤ WS6                                                 | Rodel et al. (2018) [28]       |
|                                                           | Leukocytosis                               | 1                                       | 2                     | N/A                           | Present (leukocytes >10G/L) vs absent                  | Schernberg et al. (2017) [29]  |
|                                                           | High C reactive protein to albumin ratio   | 1                                       | 1                     | N/A                           | ≤/ > 0.117                                             | Martin et al. (2019) [30]      |
|                                                           | Lower pre-treatment heamoglobin levels     | 1                                       | 1                     | N/A                           | > 120 g/L vs ≤ 120 g/L                                 | Oblak et al. (2016) [38]       |
| Locoregional<br>failure (n=11)                            | Lower HPV16 load                           | 2                                       | 3                     | N/A                           | >≤ median                                              | Balermipas et al. (2017) [27]  |
|                                                           |                                            |                                         |                       | N/A                           | >≤ median                                              | Rodel et al. (2018) [28]       |
|                                                           | Lower p16 expression                       | 1                                       | 1                     | N/A                           | >≤ median                                              | Balermipas et al. (2017) [27]  |
|                                                           | Lower CD8 expression                       | 1                                       | 1                     | N/A                           | >≤ median                                              | Balermipas et al. (2017) [27]  |
|                                                           | Lower PD-1 expression                      | 1                                       | 1                     | N/A                           | >≤ median                                              | Balermipas et al. (2017) [27]  |
|                                                           | Lower PD-L1 expression                     | 1                                       | 1                     | N/A                           | >≤ median                                              | Balermipas et al. (2017) [27]  |
|                                                           | Weaker FOXP3 phosphorylation               | 1                                       | 1                     | N/A                           | >≤ median                                              | Balermipas et al. (2017) [27]  |
|                                                           | Weaker pCasp-8 phosphorylation             | 1                                       | 1                     | N/A                           | >≤ median                                              | Balermipas et al. (2017) [27]  |
|                                                           | Lower RITA expression                      | 1                                       | 1                     | N/A                           | >≤ WS6                                                 | Rodel et al. (2018) [28]       |
|                                                           | Leukocytosis                               | 1                                       | 1                     | N/A                           | Absent vs present (leukocytes >10G/L)                  | Schernberg et al. (2017) [29]  |
|                                                           | Neutrophilia                               | 1                                       | 1                     | N/A                           | Absent vs present (neutrophils >7G/L)                  | Schernberg et al. (2017) [29]  |
|                                                           | Anaemia                                    | 1                                       | 1                     | N/A                           | Absent vs present (hemoglobin count < 13.0 g/dL)       | Schernberg et al. (2017) [29]  |
|                                                           | High C reactive protein to albumin ratio   | 1                                       | 1                     | N/A                           | ≤/ > 0.117                                             | Martin et al. (2019) [30]      |
|                                                           | Lower pre-treatment heamoglobin levels     | 1                                       | 1                     | N/A                           | > 120 g/L vs ≤ 120 g/L                                 | Oblak et al. (2016) [38]       |
|                                                           | Lower mean on-treatment heamoglobin levels | 1                                       | 1                     | N/A                           | > 120 g/L vs ≤ 120 g/L                                 | Oblak et al. (2016) [38]       |
|                                                           | Lower end-of-treatment heamoglobin levels  | 1                                       | 1                     | N/A                           | > 120 g/L vs ≤ 120 g/L                                 | Oblak et al. (2016) [38]       |

|                                                      |                                           |                                       |                           |                                   |                                                  |                                |
|------------------------------------------------------|-------------------------------------------|---------------------------------------|---------------------------|-----------------------------------|--------------------------------------------------|--------------------------------|
| <b>Disease-free survival (n=11)</b>                  | Leukocytosis                              | 2                                     | 2                         | N/A                               | Absent vs present (leukocytes >10G/L)            | Schernberg et al. (2017) [29]  |
|                                                      |                                           |                                       |                           | N/A                               | Absent vs present (leukocytes >10000/mm3)        | Schernberg et al. (2017)* [36] |
|                                                      | Neutrophilia                              | 2                                     | 2                         | N/A                               | Absent vs present (neutrophils >7G/L)            | Schernberg et al. (2017) [29]  |
|                                                      |                                           |                                       |                           | N/A                               | Absent vs present (neutrophils >7500/mm3)        | Schernberg et al. (2017)* [36] |
|                                                      | Lower CD8 expression                      | 1                                     | 1                         | N/A                               | >/≤ median                                       | Balermipas et al. (2017) [27]  |
|                                                      | Lower PD-1 expression                     | 1                                     | 1                         | N/A                               | >/≤ median                                       | Balermipas et al. (2017) [27]  |
|                                                      | Weaker FOXP3 phosphorylation              | 1                                     | 1                         | N/A                               | >/≤ median                                       | Balermipas et al. (2017) [27]  |
|                                                      | Weaker pCasp-8 phosphorylation            | 1                                     | 1                         | N/A                               | >/≤ median                                       | Balermipas et al. (2017) [27]  |
|                                                      | Lower HPV16 load                          | 1                                     | 2                         | N/A                               | >/≤ median                                       | Balermipas et al. (2017) [27]  |
|                                                      | Anaemia                                   | 1                                     | 2                         | N/A                               | Absent vs present (hemoglobin count < 13.0 g/dL) | Schernberg et al. (2017) [29]  |
| <b>Distant failure (n=5)</b>                         | High C reactive protein to albumin ratio  | 1                                     | 1                         | N/A                               | ≤/> 0.117                                        | Martin et al. (2019) [30]      |
|                                                      | Lower HPV16 load                          | 1                                     | 1                         | N/A                               | >/≤ median                                       | Rodel et al. (2018) [28]       |
|                                                      | Lower RITA expression                     | 1                                     | 1                         | N/A                               | >/≤ WS6                                          | Rodel et al. (2018) [28]       |
|                                                      | Leukocytosis                              | 1                                     | 1                         | N/A                               | Absent vs present (leukocytes >10G/L)            | Schernberg et al. (2017) [29]  |
|                                                      | Neutrophilia                              | 1                                     | 1                         | N/A                               | Absent vs present (neutrophils >7G/L)            | Schernberg et al. (2017) [29]  |
| <b>Metastasis-free survival (n=5)</b>                | High C reactive protein to albumin ratio  | 1                                     | 1                         | N/A                               | ≤/> 0.117                                        | Martin et al. (2019) [30]      |
|                                                      | Leukocytosis                              | 1                                     | 1                         | N/A                               | Absent vs present (leukocytes >10000/mm3)        | Schernberg et al. (2017)* [36] |
|                                                      | Neutrophilia                              | 1                                     | 1                         | N/A                               | Absent vs present (neutrophils >7500/mm3)        | Schernberg et al. (2017)* [36] |
|                                                      | Anaemia                                   | 1                                     | 1                         | N/A                               | Absent vs present (hemoglobin count < 13.0 g/dL) | Schernberg et al. (2017)* [36] |
| <b>Freedom from disease (n=4)</b>                    | Lower HPV16 load                          | 1                                     | 1                         | N/A                               | >/≤ median                                       | Rodel et al. (2018) [28]       |
|                                                      | Lower RITA expression                     | 1                                     | 1                         | N/A                               | >/≤ WS6                                          | Rodel et al. (2018) [28]       |
|                                                      | Lower pre-treatment heamoglobin levels    | 1                                     | 1                         | N/A                               | > 120 g/L vs ≤ 120 g/L                           | Oblak et al. (2016) [38]       |
|                                                      | Lower end-of-treatment heamoglobin levels | 1                                     | 1                         | N/A                               | > 120 g/L vs ≤ 120 g/L                           | Oblak et al. (2016) [38]       |
| <b>Cancer-specific survival (n=3)</b>                | EGFR expression                           | 1                                     | 1                         | N/A                               | Intermediate/Intense vs Absent/Weak              | Fraunholz et al. (2013) [35]   |
|                                                      | Lower pre-treatment heamoglobin levels    | 1                                     | 1                         | N/A                               | > 120 g/L vs ≤ 120 g/L                           | Oblak et al. (2016) [38]       |
|                                                      | Lower end-of-treatment heamoglobin levels | 1                                     | 1                         | N/A                               | > 120 g/L vs ≤ 120 g/L                           | Oblak et al. (2016) [38]       |
| <b>Local failure-free survival (n=2)</b>             | Leukocytosis                              | 1                                     | 1                         | N/A                               | Absent vs present (leukocytes >10000/mm3)        | Schernberg et al. (2017)* [36] |
|                                                      | Neutrophilia                              | 1                                     | 1                         | N/A                               | Absent vs present (neutrophils >7500/mm3)        | Schernberg et al. (2017)* [36] |
| <b>Multivariable analysis</b>                        |                                           |                                       |                           |                                   |                                                  |                                |
| <b>Outcome (number of studies reporting outcome)</b> | <b>Factor</b>                             | <b>Times identified as prognostic</b> | <b>Total times tested</b> | <b>Factor effect (HR, 95% CI)</b> | <b>Note</b>                                      | <b>Study</b>                   |
| <b>Overall survival (n=17)</b>                       | Leukocytosis                              | 2                                     |                           | 4.60 (1.40-14.90)                 | Absent vs present (leukocytes >10G/L)            | Schernberg et al. (2017) [29]  |
|                                                      |                                           |                                       |                           | 19.90                             | Absent vs present (leukocytes >10000/mm3)        | Schernberg et al. (2017)* [36] |
|                                                      | Neutrophilia                              | 2                                     |                           | 4.40 (1.30-14.80)                 | Absent vs present (neutrophils >7G/L)            | Schernberg et al. (2017) [29]  |
|                                                      |                                           |                                       |                           | 22.70                             | Absent vs present (neutrophils >7500/mm3)        | Schernberg et al. (2017)* [36] |
|                                                      | Lower basal heamoglobin levels            | 1                                     |                           | 1.89 (1.15-3.03)                  | Continuous                                       | Franco et al. (2018) [25]      |
|                                                      | Lower HPV16 load                          | 1                                     |                           | 2.27 (1.05-5.00)                  | >/≤ median                                       | Balermipas et al. (2017) [27]  |
|                                                      | Lower RITA expression                     | 1                                     |                           | 3.19 (1.29-7.86)                  | >/≤ WS6                                          | Rodel et al. (2018) [28]       |

|                                          |                                          |   |                   |                                                  |                                |
|------------------------------------------|------------------------------------------|---|-------------------|--------------------------------------------------|--------------------------------|
|                                          | High C reactive protein to albumin ratio | 1 | 4.47 (1.53-13.03) | ≤/≥ 0.117                                        | Martin et al. (2019) [30]      |
|                                          | Anaemia                                  | 1 | 5.40              | Absent vs present (hemoglobin count < 13.0 g/dL) | Schernberg et al. (2017)* [36] |
|                                          | Lower pre-treatment hemoglobin levels    | 1 | 2.38 (1.08-5.26)  | > 120 g/L vs ≤ 120 g/L                           | Oblak et al. (2016) [38]       |
| <b>Locoregional failure (n=11)</b>       | Lower HPV16 load                         | 2 | 3.57 (1.29-10)    | >/≤ median                                       | Balermipas et al. (2017) [27]  |
|                                          |                                          |   | 4.51 (1.15-13.46) | >/≤ median                                       | Rodel et al. (2018) [28]       |
|                                          | Lower p16 expression                     | 1 | 3.13 (1.30-7.14)  | >/≤ median                                       | Balermipas et al. (2017) [27]  |
|                                          | Lower CD8 expression                     | 1 | 4.00 (1.20-14.29) | >/≤ median                                       | Balermipas et al. (2017) [27]  |
|                                          | Lower PD-1 expression                    | 1 | 3.45 (1.39-8.33)  | >/≤ median                                       | Balermipas et al. (2017) [27]  |
|                                          | Lower PD-L1 expression                   | 1 | 3.70 (1.11-12.5)  | >/≤ median                                       | Balermipas et al. (2017) [27]  |
|                                          | Lower RITA expression                    | 1 | 4.35 (1.45-13.02) | >/≤ WS6                                          | Rodel et al. (2018) [28]       |
|                                          | Leukocytosis                             | 1 | 4.50 (1.30-15.60) | Absent vs present (leukocytes >10G/L)            | Schernberg et al. (2017) [29]  |
|                                          | Neutrophilia                             | 1 | 3.60 (1.20-11.60) | Absent vs present (neutrophils >7G/L)            | Schernberg et al. (2017) [29]  |
| <b>Disease-free survival (n=11)</b>      | Anaemia                                  | 1 | 4.10 (1.30-12.40) | Absent vs present (hemoglobin count < 13.0 g/dL) | Schernberg et al. (2017) [29]  |
|                                          | Leukocytosis                             | 2 | 7.10 (2.50-20.20) | Absent vs present (leukocytes >10G/L)            | Schernberg et al. (2017) [29]  |
|                                          |                                          |   | 6.90              | Absent vs present (leukocytes >10000/mm3)        | Schernberg et al. (2017)* [36] |
|                                          | Neutrophilia                             | 2 | 5.00 (1.70-14.50) | Absent vs present (neutrophils >7G/L)            | Schernberg et al. (2017) [29]  |
|                                          |                                          |   | 7.60              | Absent vs present (neutrophils >7500/mm3)        | Schernberg et al. (2017)* [36] |
|                                          | Anaemia                                  | 2 | 5.30 (1.90-14.70) | Absent vs present (hemoglobin count < 13.0 g/dL) | Schernberg et al. (2017) [29]  |
|                                          |                                          |   | 2.50              | Absent vs present (hemoglobin count < 13.0 g/dL) | Schernberg et al. (2017)* [36] |
|                                          | Lower CD8 expression                     | 1 | 2.38 (1.15-5.00)  | >/≤ median                                       | Balermipas et al. (2017) [27]  |
|                                          | Lower PD-1 expression                    | 1 | 2.17 (1.16-4.00)  | >/≤ median                                       | Balermipas et al. (2017) [27]  |
|                                          | Weaker FOXP3 phosphorylation             | 1 | 1.85 (1.00-3.45)  | >/≤ median                                       | Balermipas et al. (2017) [27]  |
| <b>Distant failure (n=5)</b>             | Weaker pCasp-8 phosphorylation           | 1 | 2.04 (1.06-3.84)  | >/≤ median                                       | Balermipas et al. (2017) [27]  |
|                                          | Lower HPV16 load                         | 1 | 2.50 (1.27-5.00)  | >/≤ median                                       | Balermipas et al. (2017) [27]  |
|                                          | Leukocytosis                             | 1 | 4.00 (1.60-10.30) | Absent vs present (leukocytes >10G/L)            | Schernberg et al. (2017) [29]  |
| <b>Metastasis-free survival (n=5)</b>    | Neutrophilia                             | 1 | 3.30 (1.20-9.10)  | Absent vs present (neutrophils >7G/L)            | Schernberg et al. (2017) [29]  |
|                                          | Leukocytosis                             | 1 | N/A               | Absent vs present (leukocytes >10000/mm3)        | Schernberg et al. (2017)* [36] |
|                                          | Neutrophilia                             | 1 | N/A               | Absent vs present (neutrophils >7500/mm3)        | Schernberg et al. (2017)* [36] |
| <b>Freedom from disease (n=4)</b>        | Anaemia                                  | 1 | N/A               | Absent vs present (hemoglobin count < 13.0 g/dL) | Schernberg et al. (2017)* [36] |
|                                          | Lower HPV16 load                         | 1 | 2.28 (1.08-4.79)  | >/≤ median                                       | Rodel et al. (2018) [28]       |
|                                          | Lower RITA expression                    | 1 | 2.19 (1.07-4.47)  | >/≤ WS6                                          | Rodel et al. (2018) [28]       |
| <b>Local failure-free survival (n=2)</b> | Leukocytosis                             | 1 | N/A               | Absent vs present (leukocytes >10000/mm3)        | Schernberg et al. (2017)* [36] |
|                                          | Neutrophilia                             | 1 | N/A               | Absent vs present (neutrophils >7500/mm3)        | Schernberg et al. (2017)* [36] |

**Appendix H.** Imaging factors identified as prognostic for worse outcomes through univariable and multivariable analysis, stratified by outcome. Where available, factor effects are also included.

| Univariable analysis                             |                             |                                |                    |                             |                             |
|--------------------------------------------------|-----------------------------|--------------------------------|--------------------|-----------------------------|-----------------------------|
| Outcome<br>(number of studies reporting outcome) | Factor                      | Times identified as prognostic | Total times tested | Factor effect (HR)          | Study                       |
| Overall survival (n=17)                          | Higher posttreatment SUVmax | 1                              | 1                  | 3.23                        | Cardenas et al. (2017) [33] |
|                                                  | Smaller $\Delta$ SUVmax     | 1                              | 1                  | 4.35                        | Cardenas et al. (2017) [33] |
| Local failure-free survival (n=2)                | Lower pretreatment SUVmax   | 1                              | 1                  | 3.57                        | Cardenas et al. (2017) [33] |
|                                                  | Higher posttreatment SUVmax | 1                              | 1                  | 4.35                        | Cardenas et al. (2017) [33] |
| Multivariable analysis                           |                             |                                |                    |                             |                             |
| Outcome<br>(number of studies reporting outcome) | Factor                      | Times identified as prognostic | Factor effect      | Study                       |                             |
| Overall survival (n=17)                          | Higher posttreatment SUVmax | 1                              | 2.77               | Cardenas et al. (2017) [33] |                             |
|                                                  | Smaller $\Delta$ SUVmax     | 1                              | 3.33               | Cardenas et al. (2017) [33] |                             |
| Distant failure (n=5)                            | Minimum CT value            | 1                              | N/A                | Brown et al. (2019) [23]    |                             |
|                                                  | GLCM entropy log10- PET     | 1                              | N/A                | Brown et al. (2019) [23]    |                             |
|                                                  | GLCM entropy log2- PET      | 1                              | N/A                | Brown et al. (2019) [23]    |                             |
|                                                  | NGLDM busyness- PET         | 1                              | N/A                | Brown et al. (2019) [23]    |                             |
|                                                  | Total SMTV                  | 1                              | N/A                | Brown et al. (2019) [23]    |                             |
|                                                  | Total TLG                   | 1                              | N/A                | Brown et al. (2019) [23]    |                             |
| Local failure-free survival (n=1)                | Higher posttreatment SUVmax | 1                              | 5.88               | Cardenas et al. (2017) [33] |                             |
